# Supplementary material for: The first complete T2T Assemblies of Cattle and Sheep Y-Chromosomes uncover remarkable divergence in structure and gene content
Source: Research Square preprint supplement (doi:10.21203/rs.3.rs-4033388/v1), 2024-04-03
Supplement: Supplementary file 2 [file e19e182f731c4b55aacf189f.xlsx]

## Sheet: Table SS1
Table S1: Genome assembly completeness assessment with lineage-specific orthologous genes using Compleasm. CattleHap2-Wagyu and SheepHap2-Churro are the male haplotypes containing the Y-chromosomes.
		CattleHap1-Charolais		CattleHap2-Wagyu			SheepHap1-Friesian		SheepHap2-Churro
	Merqury QV	54.24		53.68			56.13		55.43
	Genome assembly QV(both)	53.95					55.78
	Y-chromosome QV				62.37					59.94
	Genome assembly completeness	93.74		89.42			91.86		88.12
	Completeness(both)	99.51					98.29
	BUSCOs	%	Number_Of_BUSCOs	%	Number_Of_BUSCOs		%	Number_Of_BUSCOs	%	Number_Of_BUSCOs
	S	0.989	13188	0.9726	12970		0.9806	13076	0.9642	12858
	D	0.0088	118	0.0093	124		0.0151	202	0.0169	225
	F	0.0022	29	0.0088	118		0.0031	42	0.0091	121
	I	0	0	0.0001	1		0	0	0.0001	1
	M	0	0	0.0091	122		0.0011	15	0.0097	130
	CompleteBUSCOs_%	0.9978		0.9819			0.9957		0.9811
	lineage:cetartiodactyla_odb10	13335
	*Hap2 is the male haplotype harboring the Y-chromosome

## Sheet: Table SS2
Table S2: Repeat content on the cattle and the sheep T2T chromosomes
	Cattle			Sheep
Repeat_Element	content(%)	content(bp)		content(%)	content(bp)
SINEs	6.41	3813488		9.81	2541595
LINEs	34.63	20599088		32.67	8467750
LTR_elements	4.35	2588870		6.06	1570405
DNA_elements	0.38	227579		0.88	226923
Others	0.13	76786		0.24	61158
Satellites	0	1420		0	219
Simple_repeats	3.34	1988860		1.61	417164
Low_complexity	0.22	132087		0.18	47275
Non_repetitive	49.46	29428178		51.45	13332489

## Sheet: Table SS3
Table S3: Cattle T2T Y chromosome protein-coding genes annotation with homology search of protein sequences and Liftoff from the X-chromosome
homology				Liftoff
Gene	start	end	strand	Gene	start	end	strand	comments
PLCXD1	41596	50326	+	Nil	Nil	Nil	Nil
GTPBP6	45162	62948	-	Nil	Nil	Nil	Nil
PPP2R3B	68107	107772	-	PPP2R3B	67594	108560	-
SHOX	287431	298818	+	SHOX	287432	298821	+
LOC101115509	653950	676180	+	Nil	Nil	Nil	Nil	Sheep: LOC101115509, granulocyte-macrophage colony-stimulating factor receptor subunit alpha, Chromosome X
CSF2RA	660305	676180	+	Nil	Nil	Nil	Nil
LOC100336476	686903	707397	+	LOC100336476	677406	709113	+
IL3RA	719156	733819	+	Nil	Nil	Nil	Nil
SLC25A4	736611	740641	-	SLC25A6	736220	740703	-
ASMTL	746220	767443	-	LOC107131293	764349	767523	-	LOC107131293: N-acetylserotonin O-methyltransferase-like protein, Chromosome 3
P2RY8	772577	773639	-	LOC112445918	838225	840371	-	LOC112445918: basic salivary proline-rich protein 2-like, Chromosome 3
AKAP17A	840964	848331	+	AKAP17A	838566	849342	+
ASMT	861445	886300	+	Nil	Nil	Nil	Nil
DHRSX	1105862	1248137	-	DHRSX	1098418	1248231	-
ZBED1	1233195	1235316	-	ZBED1	1231071	1248231	-
CD99	1319457	1340671	+	CD99	1319373	1349633	+
XG	1352679	1379116	+	XG	1352469	1385156	+
GYG2	1389144	1412876	+	GYG2	1389130	1415697	+
ARSD	1420834	1435751	-	LOC516494	1420597	1436070	-	LOC516494: arylsulfatase D
ARSL	1438182	1451652	-	ARSH	1434261	1487962	+
Nil	Nil	Nil	Nil	ARSE	1438113	1460934	-
LOC104970184	1451650	1453394	+	LOC104970184	1451651	1453782	+
ARSH	1468862	1486842	+	Nil	Nil	Nil	Nil
MXRA5	1566697	1594275	-	MXRA5	1565250	1594353	-
PRKX	1721551	1774729	-	PRKX	1716688	1774834	-
Nil	Nil	Nil	Nil	LOC100847998	2502574	2513187	+	allergen Bos d 2-like. 1 transcript
OBP-l	2502634	2511341	+	LOC104969973	2542793	2548811	+	odorant-binding protein-like. 1 transcript
OBP-l	2542860	2546897	+	Nil	Nil	Nil	Nil
KANTR	2569795	2570022	-	Nil	Nil	Nil	Nil
Nil	Nil	Nil	Nil	LOC101903506	2587480	2598878	-	odorant-binding protein-like. 2 transcripts
Nil	Nil	Nil	Nil	OBP	2639644	2648325	+
Nil	Nil	Nil	Nil	LOC101904044	2699155	2709154	+	odorant-binding protein-like. 1 transcript
Nil	Nil	Nil	Nil	LOC505052	2716571	2727931	+	odorant-binding protein-like. 1 transcript
BOSD2-l&ca	2815030	2819431	+	LOC101908350	2814595	2819676	+	allergen Bos d 2-like. 1 transcript
Nil	Nil	Nil	Nil	LOC100300091	2846069	2851708	+	allergen Bos d 2-like. 2 transcripts
BDA20	2918916	2922701	+	BDA20	2918381	2924449	+
OBP-l	2929185	2934377	+	Nil	Nil	Nil	Nil
Nil	Nil	Nil	Nil	MGC151921	2929117	2936003	+
RPL31	3301119	3301471	-	Nil	Nil	Nil	Nil
NLGN4X	3417823	3719843	-	NLGN4X	3414886	3809697	-
PUDP	4426212	4491953	-	PUDP	4424915	4491987	-
Gm52451	4501929	4505329	+	Nil	Nil	Nil	Nil
STS	4567002	4654301	+	STS	4490649	4658099	+
PNPLA4	5164299	5204858	-	PNPLA4	5099379	5207594	-
ANOS1	5689331	5895520	-	ANOS1	5684800	5895570	-
TBL1X	6723313	6781866	+	TBL1X	6537156	6783546	+
GPR143	6789610	6818885	-	GPR143	6789255	6819003	-
EIF1AY	6880344	6891977	+	Nil	Nil	Nil	Nil
AMELY	6931684	6936374	+	Nil	Nil	Nil	Nil
OFD1Y	6973992	7036071	+	OFD1	6973416	7030323	+
USP9Y	7121518	7247073	-	Nil	Nil	Nil	Nil
ZRSR2	7326391	7381396	-	Nil	Nil	Nil	Nil
DUT	7340542	7340965	+	Nil	Nil	Nil	Nil
CINP	7430762	7431361	-	Nil	Nil	Nil	Nil
KDM6A	7439646	7623060	-	Nil	Nil	Nil	Nil
H2BC10	7460660	7461038	+	LOC528342	7460661	7461022	+	histone H2B type 2-E
DDX3X	7672610	7682660	-	DDX3X	7670227	7675726	-
Nil	Nil	Nil	Nil	CLDN34	7699317	7699982	-
SHROOM2	7717979	7820676	-	SHROOM2	7715405	7866557	-
RPL23A	7855795	7856263	+	Nil	Nil	Nil	Nil
ZFY	7989692	8010896	-	Nil	Nil	Nil	Nil
LOC105604082	8023522	8034204	+	Nil	Nil	Nil	Nil
RUM1	8034340	8036747	+	Nil	Nil	Nil	Nil
Nil	Nil	Nil	Nil	LOC104970594	8059696	8060363	+	basic proline-rich protein-like
EIF2S3	8077848	8126063	-	Nil	Nil	Nil	Nil
HSFY2-l&ca	8685049	8685379	+	Nil	Nil	Nil	Nil
UBA1	13644180	13661818	-	Nil	Nil	Nil	Nil
PRAME8&ca	13682190	13742160	+	Nil	Nil	Nil	Nil
PRAMEF6	13739213	13742169	+	Nil	Nil	Nil	Nil
UBA1	14015631	14033268	-	Nil	Nil	Nil	Nil
PRAME8&ca	14053644	14113582	+	Nil	Nil	Nil	Nil
UBA1	16687414	16705053	-	Nil	Nil	Nil	Nil
PRAME8&ca	16725408	16786250	+	Nil	Nil	Nil	Nil
PRAME	16884804	16887759	+	Nil	Nil	Nil	Nil
PRAME	17427364	17429876	+	Nil	Nil	Nil	Nil
PRAME	17451914	17454426	-	Nil	Nil	Nil	Nil
PRAME8&ca	17901386	17903829	-	Nil	Nil	Nil	Nil
PRAME	18294307	18296819	+	Nil	Nil	Nil	Nil
PRAME	18318888	18321400	-	Nil	Nil	Nil	Nil
PRAME9&mo	18319245	18321400	-	Nil	Nil	Nil	Nil
PRAME	18835194	18837706	-	Nil	Nil	Nil	Nil
TSPY10	18939677	18941683	-	Nil	Nil	Nil	Nil
TSPY10	18955376	18957382	-	Nil	Nil	Nil	Nil
TSPY10	18971075	18973081	-	Nil	Nil	Nil	Nil
TSPY10	18986773	18988779	-	Nil	Nil	Nil	Nil
TSPY10	19002472	19004478	-	Nil	Nil	Nil	Nil
TSPY10	19018168	19020174	-	Nil	Nil	Nil	Nil
TSPY10	19033867	19035873	-	Nil	Nil	Nil	Nil
PRAME	19859962	19862474	+	Nil	Nil	Nil	Nil
PRAME	19884524	19887036	-	Nil	Nil	Nil	Nil
TSPY10	19968512	19970510	-	Nil	Nil	Nil	Nil
PRAME	21097307	21099819	+	Nil	Nil	Nil	Nil
TSPY10	21649081	21651075	+	Nil	Nil	Nil	Nil
PRAME	21733019	21735531	+	Nil	Nil	Nil	Nil
PRAME	21759122	21761634	-	Nil	Nil	Nil	Nil
PRAME	22093677	22096189	+	Nil	Nil	Nil	Nil
PRAME	22118283	22120795	-	Nil	Nil	Nil	Nil
TSPY10	22202434	22204440	-	Nil	Nil	Nil	Nil
TSPY10	22218150	22220156	-	Nil	Nil	Nil	Nil
TSPY10	22233851	22235857	-	Nil	Nil	Nil	Nil
TSPY10	22265125	22267131	-	Nil	Nil	Nil	Nil
TSPY10	22280841	22282835	-	Nil	Nil	Nil	Nil
PRAME	22894806	22897318	+	Nil	Nil	Nil	Nil
OR4C1	23055868	23056788	+	Nil	Nil	Nil	Nil
TXLNG	23231547	23318790	-	Nil	Nil	Nil	Nil
LOC104970693	23625027	23625576	+	Nil	Nil	Nil	Nil
LOC105610887	23760524	23761554	+	Nil	Nil	Nil	Nil
HSFY1	24365905	24367232	-	Nil	Nil	Nil	Nil
UBE2D1	24371407	24374599	+	Nil	Nil	Nil	Nil
ZNF280C	24497328	24526459	-	Nil	Nil	Nil	Nil
UBE2D3	24796438	24796793	-	Nil	Nil	Nil	Nil
ZNF280A	25057005	25058601	+	Nil	Nil	Nil	Nil
PRAME	25189768	25194070	-	Nil	Nil	Nil	Nil
PRAME	25211112	25215413	-	Nil	Nil	Nil	Nil
PRAME	25232441	25236739	-	Nil	Nil	Nil	Nil
PRAME	25253771	25258072	-	Nil	Nil	Nil	Nil
PRAME	25275106	25279407	-	Nil	Nil	Nil	Nil
PRAME	25296450	25300755	-	Nil	Nil	Nil	Nil
PRAME	25317819	25322124	-	Nil	Nil	Nil	Nil
PRAME	25339135	25343437	-	Nil	Nil	Nil	Nil
PRAME	25356143	25360440	-	Nil	Nil	Nil	Nil
PRAME	25403135	25408088	+	Nil	Nil	Nil	Nil
LOC101108258	25424450	25429398	+	Nil	Nil	Nil	Nil
ZNF280A	25559830	25561524	-	Nil	Nil	Nil	Nil
UBE2D3	25922252	25922579	-	Nil	Nil	Nil	Nil
ZNF280A	26082422	26084017	+	Nil	Nil	Nil	Nil
UBE2D3&sh	26200635	26200989	-	Nil	Nil	Nil	Nil
UBE2D4	26482682	26483123	+	Nil	Nil	Nil	Nil
ZNF280B	26582882	26584511	-	Nil	Nil	Nil	Nil
UBE2D1	26797405	26797735	-	Nil	Nil	Nil	Nil
ZNF280A	27159671	27161266	-	Nil	Nil	Nil	Nil
ZNF280A	27358396	27359991	+	Nil	Nil	Nil	Nil
HSFY1	27484158	27485488	+	Nil	Nil	Nil	Nil
UBE2D3	27665523	27665844	-	Nil	Nil	Nil	Nil
HSFY1	27783314	27784644	-	Nil	Nil	Nil	Nil
UBE2D2	28015252	28015672	-	Nil	Nil	Nil	Nil
ZNF280B	28197926	28199555	-	Nil	Nil	Nil	Nil
ZNF280B	28864480	28866109	-	Nil	Nil	Nil	Nil
ZNF280B	29344345	29345974	-	Nil	Nil	Nil	Nil
HSFY1	29675819	29677389	+	Nil	Nil	Nil	Nil
HSFY1	29846305	29847635	-	Nil	Nil	Nil	Nil
UBE2D3	30224209	30224626	+	Nil	Nil	Nil	Nil
ZNF280B	30323456	30325085	-	Nil	Nil	Nil	Nil
env&ca	30527250	30528684	+	Nil	Nil	Nil	Nil
UBE2D3	30818589	30818910	+	Nil	Nil	Nil	Nil
ZNF280A	30889719	30891411	-	Nil	Nil	Nil	Nil
Zfp280b	31110801	31112430	+	Nil	Nil	Nil	Nil
UBE2D3	31211081	31211501	-	Nil	Nil	Nil	Nil
HSFY1	31218309	31219858	+	Nil	Nil	Nil	Nil
Gm19457	31534073	31534427	+	Nil	Nil	Nil	Nil
UBE2D3	31615896	31616217	-	Nil	Nil	Nil	Nil
ZNF280A	31884832	31886427	+	Nil	Nil	Nil	Nil
UBE2D3	32277714	32278035	-	Nil	Nil	Nil	Nil
UBE2D1	32996128	32996458	+	Nil	Nil	Nil	Nil
HSFY2	33038989	33040670	-	Nil	Nil	Nil	Nil
UBE2D4	33047554	33047884	+	Nil	Nil	Nil	Nil
HSFY2	33090333	33092014	-	Nil	Nil	Nil	Nil
HSFY2	33183575	33185256	+	Nil	Nil	Nil	Nil
LOC112443502	33247978	33251337	+	Nil	Nil	Nil	Nil
UBE2D4	33546774	33547215	+	Nil	Nil	Nil	Nil
UBE2D3	33624133	33624454	-	Nil	Nil	Nil	Nil
ZNF280B	33910251	33911880	+	Nil	Nil	Nil	Nil
LOC112443502	33920204	33923563	-	Nil	Nil	Nil	Nil
UBE2D1	34072129	34072459	-	Nil	Nil	Nil	Nil
UBE2D1	34458379	34458709	-	Nil	Nil	Nil	Nil
UBE2D4	34781224	34781650	+	Nil	Nil	Nil	Nil
LOC112443502	34877004	34880363	+	Nil	Nil	Nil	Nil
LOC104969408	34880584	34882015	+	Nil	Nil	Nil	Nil
ZNF280B	34888659	34890288	-	Nil	Nil	Nil	Nil
UBE2D1	35110385	35110715	+	Nil	Nil	Nil	Nil
ZNF280A	35181557	35183249	-	Nil	Nil	Nil	Nil
ZNF280B	35402916	35404545	+	Nil	Nil	Nil	Nil
Gm19457	35503296	35503650	-	Nil	Nil	Nil	Nil
LOC104969408	35917215	35918646	+	Nil	Nil	Nil	Nil
ZNF280B	35925284	35926913	-	Nil	Nil	Nil	Nil
ZNF280B	36166724	36168353	+	Nil	Nil	Nil	Nil
HSFY2	36343463	36345144	-	Nil	Nil	Nil	Nil
UBE2D1	36433862	36434192	-	Nil	Nil	Nil	Nil
LOC112443502	37005083	37008442	-	Nil	Nil	Nil	Nil
HSFY2	37111127	37112808	+	Nil	Nil	Nil	Nil
ENOSF1	37416344	37418612	-	Nil	Nil	Nil	Nil
UBE2D1	37424058	37427355	+	Nil	Nil	Nil	Nil
UBE2D4	37782814	37783255	+	Nil	Nil	Nil	Nil
Gm19457	37860252	37860606	-	Nil	Nil	Nil	Nil
UBXN8	37934815	37935444	+	Nil	Nil	Nil	Nil
ZNF280B	37943570	37945199	-	Nil	Nil	Nil	Nil
UBE2D4	38230823	38231153	+	Nil	Nil	Nil	Nil
UBE2D3	38308062	38308383	-	Nil	Nil	Nil	Nil
ZNF280B	38593744	38595373	+	Nil	Nil	Nil	Nil
UBXN8	38603485	38604114	-	Nil	Nil	Nil	Nil
UBE2D4	39141669	39141999	+	Nil	Nil	Nil	Nil
UBE2D3	39218928	39219249	-	Nil	Nil	Nil	Nil
ZNF280B	39504811	39506440	+	Nil	Nil	Nil	Nil
LOC112443502	39514763	39518122	-	Nil	Nil	Nil	Nil
HSFY2	40930009	40931689	+	Nil	Nil	Nil	Nil
LOC104969408	40997954	40999385	+	Nil	Nil	Nil	Nil
UBE2D4	41293276	41293717	+	Nil	Nil	Nil	Nil
ZNF280B	41613200	41614829	+	Nil	Nil	Nil	Nil
LOC104969408	41621488	41622919	-	Nil	Nil	Nil	Nil
UBXN8	41622919	41623548	-	Nil	Nil	Nil	Nil
UBE2E1	41670548	41698094	+	Nil	Nil	Nil	Nil
UBE2D3	41773926	41774247	-	Nil	Nil	Nil	Nil
UBE2D1	42159720	42160050	-	Nil	Nil	Nil	Nil
ENOSF1	42168446	42170714	+	Nil	Nil	Nil	Nil
HSFY1	42175491	42176821	+	Nil	Nil	Nil	Nil
HSFY2	42405921	42407602	-	Nil	Nil	Nil	Nil
Gm19457	42414464	42414818	+	Nil	Nil	Nil	Nil
LOC104969408	42513822	42515253	+	Nil	Nil	Nil	Nil
ZNF280B	42521938	42523567	-	Nil	Nil	Nil	Nil
UBE2D1	42742965	42743406	+	Nil	Nil	Nil	Nil
ZNF280A	42814300	42815992	-	Nil	Nil	Nil	Nil
UBE2D1	43398834	43402011	+	Nil	Nil	Nil	Nil
ZNF280B	43509215	43510844	-	Nil	Nil	Nil	Nil
ZNF280B	43750696	43752325	+	Nil	Nil	Nil	Nil
HSFY2	43924978	43926659	-	Nil	Nil	Nil	Nil
Gm19457	43933521	43933875	+	Nil	Nil	Nil	Nil
ZNF280B	44040999	44042610	-	Nil	Nil	Nil	Nil
UBE2D4	44215866	44216307	+	Nil	Nil	Nil	Nil
Zfp280b	44508159	44509788	+	Nil	Nil	Nil	Nil
ZNF280B	44999065	45000694	-	Nil	Nil	Nil	Nil
UBE2D1	45281630	45281960	+	Nil	Nil	Nil	Nil
ZNF280A	45352738	45354430	-	Nil	Nil	Nil	Nil
ZNF280B	45568981	45570610	+	Nil	Nil	Nil	Nil
HSFY2	45676481	45678051	+	Nil	Nil	Nil	Nil
LOC104969408	46083132	46084563	+	Nil	Nil	Nil	Nil
ZNF280B	46091226	46092855	-	Nil	Nil	Nil	Nil
LOC112443502	47128211	47131570	+	Nil	Nil	Nil	Nil
ZNF280B	47139879	47141508	-	Nil	Nil	Nil	Nil
UBE2D4	47427113	47427443	+	Nil	Nil	Nil	Nil
ZNF280B	47663821	47665450	-	Nil	Nil	Nil	Nil
ZNF280B	48273060	48274689	+	Nil	Nil	Nil	Nil
UBXN8	48282804	48283433	-	Nil	Nil	Nil	Nil
LOC112443502	48283025	48286384	-	Nil	Nil	Nil	Nil
HSFY2	48442231	48443912	+	Nil	Nil	Nil	Nil
LOC112443502	48506573	48509932	+	Nil	Nil	Nil	Nil
ZNF280B	48518261	48519890	-	Nil	Nil	Nil	Nil
UBE2D4	48805135	48805561	+	Nil	Nil	Nil	Nil
HSFY2	48848047	48849728	-	Nil	Nil	Nil	Nil
HSFY2	48941293	48942974	+	Nil	Nil	Nil	Nil
ZNF280B	49271175	49272804	+	Nil	Nil	Nil	Nil
LOC104969408	49279474	49280905	-	Nil	Nil	Nil	Nil
UBE2D2	49704216	49704636	+	Nil	Nil	Nil	Nil
ZNF280B	50080053	50081664	-	Nil	Nil	Nil	Nil
ENOSF1	50115807	50118075	+	Nil	Nil	Nil	Nil
ZNF280B	50321044	50322673	+	Nil	Nil	Nil	Nil
LOC104969408	50329325	50330759	-	Nil	Nil	Nil	Nil
ZNF280B	50843291	50844920	-	Nil	Nil	Nil	Nil
ZNF280A	51064373	51066065	+	Nil	Nil	Nil	Nil
UBE2D2	51136844	51137264	-	Nil	Nil	Nil	Nil
ZNF280B	51310583	51312212	+	Nil	Nil	Nil	Nil
LOC104969408	51318869	51320303	-	Nil	Nil	Nil	Nil
HSFY2	51426575	51428256	+	Nil	Nil	Nil	Nil
ENOSF1	51731604	51733872	-	Nil	Nil	Nil	Nil
UBE2D1	51739310	51742497	+	Nil	Nil	Nil	Nil
UBXN8	52280349	52280978	+	Nil	Nil	Nil	Nil
ZNF280B	52289066	52290695	-	Nil	Nil	Nil	Nil
ZNF280B	52942379	52944008	+	Nil	Nil	Nil	Nil
LOC104969408	52950693	52952127	-	Nil	Nil	Nil	Nil
LOC112443502	52952345	52955704	-	Nil	Nil	Nil	Nil
HSFY2	53111597	53113278	+	Nil	Nil	Nil	Nil
UBXN8	53178913	53179542	+	Nil	Nil	Nil	Nil
LOC104969408	53179542	53180973	+	Nil	Nil	Nil	Nil
ZNF280B	53187662	53189291	-	Nil	Nil	Nil	Nil
UBE2D2	53474797	53475217	+	Nil	Nil	Nil	Nil
HSFY2	53517700	53519381	-	Nil	Nil	Nil	Nil
HSFY2	53616076	53617757	+	Nil	Nil	Nil	Nil
LOC104969408	53953160	53954591	-	Nil	Nil	Nil	Nil
UBXN8	53954597	53955220	-	Nil	Nil	Nil	Nil
HSFY2	54060807	54062488	+	Nil	Nil	Nil	Nil
ENOSF1	54366038	54368306	-	Nil	Nil	Nil	Nil
UBE2D4	55037124	55037565	+	Nil	Nil	Nil	Nil
ZNF280B	55308992	55310621	-	Nil	Nil	Nil	Nil
LOC104969408	55856748	55858182	-	Nil	Nil	Nil	Nil
UBE2D4	55932864	55933305	+	Nil	Nil	Nil	Nil
LOC104969408	56298669	56300103	-	Nil	Nil	Nil	Nil
UBE2D2	56374843	56375263	+	Nil	Nil	Nil	Nil
ZNF280B	56736471	56738082	+	Nil	Nil	Nil	Nil
HSFY1	56845326	56846656	+	Nil	Nil	Nil	Nil
ZNF280B	57331482	57333111	-	Nil	Nil	Nil	Nil
ENOSF1	57367245	57369513	+	Nil	Nil	Nil	Nil
ZNF280B	57697258	57698887	+	Nil	Nil	Nil	Nil
UBE2D2	57797710	57798130	-	Nil	Nil	Nil	Nil
HSFY1	57804946	57806516	+	Nil	Nil	Nil	Nil
SRY	58122908	58123595	-
Gm52512	58243937	58245720	-	Nil	Nil	Nil	Nil
Nil	Nil	Nil	Nil	LOC112445026	59049662	59055512	-
TSPY1-l&ca	59083445	59085265	+	Nil	Nil	Nil	Nil
RBMX	59146895	59155555	+	Nil	Nil	Nil	Nil
RBMX	59170832	59179493	+	Nil	Nil	Nil	Nil
RBMX	59194770	59203431	+	Nil	Nil	Nil	Nil
RBMX	59218708	59227370	+	Nil	Nil	Nil	Nil
RBMX	59242650	59251306	+	Nil	Nil	Nil	Nil
RBMX	59266584	59275245	+	Nil	Nil	Nil	Nil
RBMX	59290526	59299182	+	Nil	Nil	Nil	Nil
RBMX	59314468	59323130	+	Nil	Nil	Nil	Nil
RBMX	59338408	59347064	+	Nil	Nil	Nil	Nil
RBMX	59362343	59371000	+	Nil	Nil	Nil	Nil
RBMX	59386279	59394941	+	Nil	Nil	Nil	Nil
PSMB6	59458668	59459383	+	Nil	Nil	Nil	Nil

## Sheet: Table SS4
Table S4: Sheep T2T Y chromosome protein-coding genes annotation with homology search of protein sequences and Liftoff from the X-chromosome
homology				Liftoff
Gene	start	end	strand	Gene	start	end	strand	Comments
PLCXD1	33754	46413	+	PLCXD1	33561	46817	+
GTPBP6	41023	60389	-	GTPBP6	50367	60402	-
PPP2R3B	65396	112039	-	PPP2R3B	64883	112577	-
Nil	Nil	Nil	Nil	LOC114111344	95590	101088	-	LOC114111344: translation initiation factor IF-2-like on Chromosome X
SHOX	300795	311935	+	SHOX	300796	311939	+
LOC112444884	438353	521778	-	Nil	Nil	Nil	Nil	LOC112444884: From cattle, basic proline-rich protein-like, Chromosome 29
Nil	Nil	Nil	Nil	CRLF2	624611	644506	-
CSF2RA	679782	695706	+	LOC101115509	667950	697205	+	LOC101115509: Also known as CSF2RA, granulocyte-macrophage colony-stimulating factor receptor subunit alpha.
LOC105605313	706869	727893	+	LOC105605313	703802	729763	+
IL3RA	739245	754598	+	IL3RA	735329	754882	+
SLC25A6	757535	761608	-	SLC25A6	757533	761608	-
ASMTL	767534	786496	-	ASMTL	767432	786561	-
P2RY8	792123	793185	-	P2RY8	788955	845889	-
AKAP17A	871614	878820	+	AKAP17A	869145	879837	+
ASMT	892428	918248	+	ASMT	892332	918274	+
DHRSX	1126631	1264496	-	DHRSX	1126172	1264564	-
ZBED1	1248912	1251033	-	ZBED1	1245070	1264564	-
CD99	1335799	1365590	+	CD99	1335717	1366153	+
XG	1372744	1392197	+	XG	1365629	1398693	+
GYG2	1409690	1425260	+	GYG2	1404595	1428892	+
ARSD	1434597	1447383	-	ARSD	1433967	1450301	-
ARSL	1452571	1467792	-	ARSH	1448799	1499466	+
LOC104970184	1468694	1469530	+	ARSL	1451957	1472776	-
ARSH	1482694	1498170	+	Nil	Nil	Nil	Nil	Cattle uncharacterized LOC104970184, Chromosome X
MXRA5	1581651	1608839	-	MXRA5	1580195	1608920	-
PRKX	1737270	1791831	-	PRKX	1712222	1792212	-
ZNF160-l&sh	2204873	2214073	-	LOC101117055	2158086	2228861	-	zinc finger protein 160-like, Chromosome X
ATP5MC2	2214888	2215307	+	Nil	Nil	Nil	Nil	ATP5MC2 Sheep Chromosome 3
OBP-l&sh	2612517	2622306	+	LOC121818296	2507930	2517121	+	odorant-binding protein-like, Chromosome X. 1 transcript
Nil	Nil	Nil	Nil	LOC114111263	2612453	2624131	+	odorant-binding protein-like, Chromosome X. 2 trancripts
Nil	Nil	Nil	Nil	LOC101116018	2647353	2654804	+	odorant-binding protein-like, Chromosome X. 1 transcript
PRELID1	2674338	2674986	+	LOC114111162	2674154	2675390	+	PRELI domain-containing protein 1, mitochondrial-like, Chromosome X
OBP-l&ca	2685205	2686893	-	LOC105605670	2720718	2744485	+	odorant-binding protein-like, Chromosome X. 1 transcript
OBP-l&sh	2720717	2744482	+	LOC121818248	2754167	2765214	+	odorant-binding protein-like, Chromosome X. 1 transcript
BOSD2-l&ca	2964934	2969346	+	LOC121818205	2964808	2972166	+	LOC121818205: allergen Bos d 2-like, Chromosome X. 1 transcript
Nil	Nil	Nil	Nil	LOC114111402	2991501	3065663	+	LOC114111402: allergen Bos d 2-like, Chromosome X. 1 transcript
Nil	Nil	Nil	Nil	LOC114111404	3072385	3078782	+	LOC114111404: allergen Bos d 2-like, Chromosome X. 1 transcript
Nil	Nil	Nil	Nil	LOC101116799	3081975	3088847	+	LOC101116799: allergen Bos d 2-like, Chromosome X. 2 transcripts
BDA20	3072413	3076095	+	Nil	Nil	Nil	Nil
MGC151921	3082027	3086775	+	Nil	Nil	Nil	Nil
NLGN4X	3579789	3885702	-	NLGN4X	3576853	3977703	-
LOC114118022	3988825	3991827	+	Nil	Nil	Nil	Nil
ENOSF1	4071858	4074126	-	Nil	Nil	Nil	Nil
PUDP	4606546	4662764	-	LOC101118336	4605380	4662796	-	PUDP/HDHD1
STS	4730783	4816212	+	STS	4661996	4819703	+
HINT1	5292553	5292931	-	LOC114111378	5292393	5292935	-	HINT1: histidine triad nucleotide-binding protein 1-like
PNPLA4	5338512	5371970	-	PNPLA4	5337905	5379338	-
ANOS1	5856138	6071359	-	ANOS1	5851521	6071468	-
LOC112446342	6021104	6021785	+	Nil	Nil	Nil	Nil	Cattle: LOC112446342: uncharacterized
LOC124900165	6051637	6053290	-	Nil	Nil	Nil	Nil	Human: LOC124900165: uncharacterize
LOC112267992	6453781	6454768	+	Nil	Nil	Nil	Nil	Human: LOC112267992: uncharacterized
TBL1XR1	6917378	6976002	+	TBL1X	6731620	6979460	+
GPR143	6984393	7014882	-	GPR143	6984028	7014897	-
CHP2	7063130	7063917	-	Nil	Nil	Nil	Nil	Sheep: Chromosome 24
AMELX	7098103	7102736	+	AMELX	7098104	7102739	+
LOC121816921	7207005	7207559	+	Nil	Nil	Nil	Nil	Sheep: Chromosome 17
OFD1	7215047	7298792	+	OFD1	7220434	7298892	+
LOC112446342	7264494	7265175	-	Nil	Nil	Nil	Nil
USP9X	7388247	7502594	-	Nil	Nil	Nil	Nil
NUDT15	7423165	7424159	+	Nil	Nil	Nil	Nil
ARPC1A	7570226	7571265	+	Nil	Nil	Nil	Nil
GPM6B	7635253	7660819	+	Nil	Nil	Nil	Nil
KDM6A	7693710	7859067	-	Nil	Nil	Nil	Nil
UTY	7693713	7859067	-	Nil	Nil	Nil	Nil
DDX3X	7888838	7899802	-	DDX3X	7886479	7893654	-
LOC100848171	8204661	8206797	-	Nil	Nil	Nil	Nil
LOC118567843	8289745	8292975	+	Nil	Nil	Nil	Nil
ZFX	8412212	8429839	-	ZFX	8411462	8429856	-
RUM1	8463528	8464932	+	Nil	Nil	Nil	Nil
Nil	Nil	Nil	Nil	LOC114111439	8489336	8490007	+
EIF2S3	8508501	8553284	-	Nil	Nil	Nil	Nil
SHROOM2	8577445	8715813	-	SHROOM2	8574919	8715994	-
Nil	Nil	Nil	Nil	LOC121818243	8967743	8972852	-	Sheep: Chromosome X
Nil	Nil	Nil	Nil	Nil	Nil	Nil	Nil
TSPY2	9037032	9044838	+	Nil	Nil	Nil	Nil
LOC121817730	9139766	9140159	-	Nil	Nil	Nil	Nil
TSTY3-l&hu	9357774	9359585	-	Nil	Nil	Nil	Nil
COMMD2	9397790	9398387	+	Nil	Nil	Nil	Nil
KANTR	9400642	9400870	-	Nil	Nil	Nil	Nil
TSTY3-l&hu	9512789	9514604	+	Nil	Nil	Nil	Nil
Nil	Nil	Nil	Nil	LOC114111619	9595605	9597540	+	LOC114111619: MLV-related proviral Env polyprotein-like
G3BP1	10033377	10034820	+	Nil	Nil	Nil	Nil
LOC121818505	10140839	10145814	-	Nil	Nil	Nil	Nil
TSPY2	10288314	10296122	+	Nil	Nil	Nil	Nil
ERVG-l&sh	10846279	10850793	+	Nil	Nil	Nil	Nil
RPF2	11103911	11104914	+	Nil	Nil	Nil	Nil
ERVG-l&ca	11207724	11208764	+	Nil	Nil	Nil	Nil
ERVG-l&sh	11438940	11440775	-	Nil	Nil	Nil	Nil
ZNF280A	11641270	11642863	-	Nil	Nil	Nil	Nil
HSFY1	11688483	11690147	+	Nil	Nil	Nil	Nil
LOC114111632	11732712	11734583	+	LOC114111632	11732713	11734586	+
PRAME12-l&ca	11936578	11941870	-	Nil	Nil	Nil	Nil
PRM3	12483373	12483640	+	Nil	Nil	Nil	Nil
LOC121816279	12553074	12553768	+	LOC121818210	12552205	12556267	+	Sheep: LOC121816279, natural cytotoxicity triggering receptor 3 ligand 1-like, Chromosome 1
TSPY	13642925	13645103	-	Nil	Nil	Nil	Nil
EIF1AX	13660830	13676722	-	Nil	Nil	Nil	Nil
Nil	Nil	Nil	Nil	LOC106990654	14243423	14246790	+	Sheep: LOC106990654, PI-PLC X domain-containing protein 1-like
Nil	Nil	Nil	Nil	LOC114111641	14358151	14359662	-	Sheep: LOC114111641, PWWP domain-containing DNA repair factor 3B-like
HSFY1	14383665	14385094	-	Nil	Nil	Nil	Nil
ERVG-l&sh	14402231	14407154	+	LOC114110281	14402232	14407157	+	LOC114110281: endogenous retrovirus group K member 8 Gag polyprotein-like
ERVG-l&sh	14407172	14408999	+	Nil	Nil	Nil	Nil
ERVG-l&sh	14617948	14619779	-	Nil	Nil	Nil	Nil
PRAME	14779661	14782624	-	Nil	Nil	Nil	Nil
LOC106990624	14872838	14876994	-	LOC114111626	14872830	14877427	-	LOC106990624 & LOC114111626: uncharacterized
LOC104969408	14938223	14939647	-	Nil	Nil	Nil	Nil
UBA1	15014502	15035259	+	Nil	Nil	Nil	Nil
ERVG-l&sh	15233487	15292936	-	Nil	Nil	Nil	Nil
ERVG-l&sh	15552457	15553435	+	Nil	Nil	Nil	Nil
LOC114110072	15715199	15716913	-	Nil	Nil	Nil	Nil
ZNF280D	16331568	16342290	-	Nil	Nil	Nil	Nil
SRY	17199802	17200489	+	Nil	Nil	Nil	Nil
HSFY2	17627373	17629039	-	Nil	Nil	Nil	Nil
ZNF280B	17655545	17657168	-	Nil	Nil	Nil	Nil
ZNF280B	17965109	17966720	+	Nil	Nil	Nil	Nil
ZNF280A	17984893	18077021	-	Nil	Nil	Nil	Nil
ZNF280A	18342229	18343825	+	Nil	Nil	Nil	Nil
ZNF280A	18737162	18738761	-	Nil	Nil	Nil	Nil
ENOSF1	18859534	18861802	+	Nil	Nil	Nil	Nil
Zfp280b	19064526	19160935	+	Nil	Nil	Nil	Nil
ZNF280A	19177491	19179090	-	Nil	Nil	Nil	Nil
Zfp280b	19452754	19549242	-	Nil	Nil	Nil	Nil
ENOSF1	19943383	19945651	+	Nil	Nil	Nil	Nil
ENOSF1	20136421	20138689	-	Nil	Nil	Nil	Nil
ZNF280BY	20398513	20400148	+	Nil	Nil	Nil	Nil
ZNF280B	20416672	20418286	-	Nil	Nil	Nil	Nil
ZNF280A	20887025	20888624	+	Nil	Nil	Nil	Nil
Zfp280d	20946063	21041283	-	Nil	Nil	Nil	Nil
ZNF280A	21110589	21112188	+	Nil	Nil	Nil	Nil
ZNF280B	21170801	21172409	+	Nil	Nil	Nil	Nil
ZNF280BY	21495200	21496838	-	Nil	Nil	Nil	Nil
ENOSF1	21764911	21767179	+	Nil	Nil	Nil	Nil
ZNF280A	21998858	22000454	+	Nil	Nil	Nil	Nil
ZNF280B	22488212	22489826	+	Nil	Nil	Nil	Nil
ENOSF1	22642634	22644902	-	Nil	Nil	Nil	Nil
ZNF280B	22958330	22959944	-	Nil	Nil	Nil	Nil
ZNF280BY	23639503	23641138	+	Nil	Nil	Nil	Nil
ZNF280BY	23659292	23660927	-	Nil	Nil	Nil	Nil
ZNF280BY	24284151	24285786	+	Nil	Nil	Nil	Nil
ZNF280A	24393565	24395164	-	Nil	Nil	Nil	Nil
ZNF280A	24464515	24466114	+	Nil	Nil	Nil	Nil
ZNF280BY	24573886	24575521	-	Nil	Nil	Nil	Nil
ZNF280B-l&ca	24702516	24802645	+	Nil	Nil	Nil	Nil
ZNF280B	24819033	24820668	-	Nil	Nil	Nil	Nil
ZNF280BY	25303928	25305566	+	Nil	Nil	Nil	Nil
ZNF280BY	25584485	25586120	-	Nil	Nil	Nil	Nil
ENOSF1	25762517	25764785	+	Nil	Nil	Nil	Nil
LOC121819864	25840567	25845199	+	LOC121818211	25839658	25844817	+	LOC121819864 & LOC121818211: uncharacterized
EI24	25850588	25851595	-	Nil	Nil	Nil	Nil
RBMX	25873955	25882593	+	Nil	Nil	Nil	Nil

## Sheet: Table SS5
Table S5: NCBI annotation of the cattle T2T Y-chromosome
The gene names (when available) of the originally annotated "LOC…" genes have been used.
	chr	start	end	gene	type	strand
	Cattle	34576	50731	PLCXD1	protein_coding	+			PAR
	Cattle	54425	62973	GTPBP6	protein_coding	-			X-degenerate
	Cattle	67594	108565	PPP2R3B	protein_coding	-			Ampliconic
	Cattle	108635	112866	LOC132344458	lncRNA	+
	Cattle	287024	298821	SHOX	protein_coding	+
	Cattle	607727	626421	CRLF2	protein_coding	-
	Cattle	641983	709113	CSF2RA	protein_coding	+
	Cattle	714844	734090	IL3RA	protein_coding	+
	Cattle	736218	740740	SLC25A6	protein_coding	-
	Cattle	746117	767494	ASMTL	protein_coding	-
	Cattle	770056	818420	P2RY8	protein_coding	-
	Cattle	831192	840371	LOC112445918	protein_coding	-
	Cattle	838565	849342	AKAP17A	protein_coding	+
	Cattle	860377	887081	ASMTL	pseudogene	+
	Cattle	1024474	1248196	DHRSX	protein_coding	-
	Cattle	1231077	1248196	ZBED1	protein_coding	-
	Cattle	1241669	1241797	LOC112445271	snoRNA	+
	Cattle	1278119	1292965	LOC132344373	protein_coding	-
	Cattle	1302411	1320049	LOC104970645	lncRNA	-
	Cattle	1319379	1349633	CD99	protein_coding	+
	Cattle	1352524	1385156	XG	protein_coding	+
	Cattle	1389142	1415578	GYG2	protein_coding	+
	Cattle	1420043	1435771	ARSD	protein_coding	-
	Cattle	1434360	1487950	ARSH	protein_coding	+
	Cattle	1438113	1459455	ARSL	protein_coding	-
	Cattle	1565250	1594372	MXRA5	protein_coding	-
	Cattle	1715307	1775120	PRKX	protein_coding	-
	Cattle	2126184	2126257	TRNAY	tRNA	+
	Cattle	2201572	2201644	TRNAC	tRNA	+
	Cattle	2259967	2260038	TRNAW	tRNA	+
	Cattle	2502559	2513187	BOS2D	protein_coding	+
	Cattle	2529009	2536100	LOC104969972	lncRNA	+
	Cattle	2542823	2548809	OBP	protein_coding	+
	Cattle	2587490	2590411	LOC132344569	lncRNA	-
	Cattle	2639655	2648325	OBP	protein_coding	+
	Cattle	2807304	2807375	TRNAC	tRNA	-
	Cattle	2846242	2850132	BOS2D	protein_coding	+
	Cattle	2850861	3002613	LOC132344372	lncRNA	-
	Cattle	2929133	2936001	OBP	protein_coding	+
	Cattle	3301073	3301494	eL31	pseudogene	-
	Cattle	3414886	3809870	NLGN4X	protein_coding	-
	Cattle	3451502	3451603	RNU6-1	snRNA	+
	Cattle	4089322	4235823	LOC100847628	lncRNA	-
	Cattle	4096950	4097022	TRNAV	tRNA	-
	Cattle	4424918	4491974	PUDP	protein_coding	-
	Cattle	4491221	4654535	STS	protein_coding	+
	Cattle	4743102	4743208	RNU6-1	snRNA	-
	Cattle	4877329	4877402	TRNAC	tRNA	-
	Cattle	5164225	5208620	PNPLA4	protein_coding	-
	Cattle	5207061	5260468	LOC101902122	protein_coding	+
	Cattle	5241093	5241165	TRNAE	tRNA	-
	Cattle	5299768	5365661	LOC132344465	lncRNA	+
	Cattle	5369498	5617762	LOC132344464	lncRNA	+
	Cattle	5381784	5381888	RNU6-1	snRNA	+
	Cattle	5435036	5435107	TRNAC	tRNA	+
	Cattle	5684801	5895644	ANOS1	protein_coding	-
	Cattle	6346985	6400388	LOC132344370	lncRNA	-
	Cattle	6359019	6359090	TRNAC	tRNA	-
	Cattle	6537172	6782468	TBL1X	protein_coding	+
	Cattle	6789255	6818929	GPR143	protein_coding	-
	Cattle	6878364	6894899	EIF1AY	protein_coding	+
	Cattle	6931685	6937915	AMELY	protein_coding	+
	Cattle	6973860	7037467	OFD1Y	protein_coding	+
	Cattle	6995014	6995119	RNU6-1	snRNA	-
	Cattle	7023944	7024048	RNU6-1	snRNA	+
	Cattle	7120084	7247224	USP9Y	protein_coding	-
	Cattle	7326343	7381809	ZRSR2Y	protein_coding	-
	Cattle	7405106	7408772	GPM6B	pseudogene	+
	Cattle	7437959	7623372	KDM6A	protein_coding	-
	Cattle	7670282	7683444	DDX3Y	protein_coding	-
	Cattle	7715848	7866350	SHROOM2	protein_coding	-
	Cattle	7855783	7856319	RPL23A	protein_coding	+
	Cattle	7987375	8061279	ZFY	protein_coding	-
	Cattle	8077502	8126092	EIF2S3	protein_coding	-
	Cattle	8532738	8548763	LOC101902149	protein_coding	-
	Cattle	8616324	8640144	UBA1	pseudogene	+
	Cattle	8667613	8704208	LOC132344570	lncRNA	-
	Cattle	8684919	8686815	HSFY2	protein_coding	+
	Cattle	8816754	8818347	ZNF280A	pseudogene	-
	Cattle	9169601	9172796	TSPY1	protein_coding	+
	Cattle	9177131	9179362	TSPY1	protein_coding	+
	Cattle	9192022	9194156	TSPY1	protein_coding	+
	Cattle	9199421	9201533	TSPY1	protein_coding	+
	Cattle	9228925	9231057	TSPY1	protein_coding	+
	Cattle	9236322	9238454	TSPY1	protein_coding	+
	Cattle	9243718	9245850	TSPY1	protein_coding	+
	Cattle	9251121	9253253	TSPY1	protein_coding	+
	Cattle	9265914	9268046	TSPY1	protein_coding	+
	Cattle	9273311	9275443	TSPY1	protein_coding	+
	Cattle	9325056	9327307	TSPY1	protein_coding	+
	Cattle	9332467	9334718	TSPY1	protein_coding	+
	Cattle	9339878	9342133	TSPY1	protein_coding	+
	Cattle	9347293	9349546	TSPY1	protein_coding	+
	Cattle	9354706	9356953	TSPY1	protein_coding	+
	Cattle	9362111	9364337	TSPY1	protein_coding	+
	Cattle	9435132	9437264	TSPY1	protein_coding	+
	Cattle	9442531	9444663	TSPY1	protein_coding	+
	Cattle	9449928	9452060	TSPY1	protein_coding	+
	Cattle	9457325	9459457	TSPY1	protein_coding	+
	Cattle	9493910	9496042	TSPY1	protein_coding	+
	Cattle	9508707	9510839	TSPY1	protein_coding	+
	Cattle	9516104	9518236	TSPY1	protein_coding	+
	Cattle	9523501	9525627	TSPY1	protein_coding	+
	Cattle	9582590	9584722	TSPY1	protein_coding	+
	Cattle	9589988	9592120	TSPY1	protein_coding	+
	Cattle	9604673	9606899	TSPY1	protein_coding	+
	Cattle	9612199	9614439	TSPY1	protein_coding	+
	Cattle	9627252	9629486	TSPY1	protein_coding	+
	Cattle	9634774	9637008	TSPY1	protein_coding	+
	Cattle	9642296	9644530	TSPY1	protein_coding	+
	Cattle	9657351	9659569	TSPY1	protein_coding	+
	Cattle	9664864	9667082	TSPY1	protein_coding	+
	Cattle	9694997	9697236	TSPY1	protein_coding	+
	Cattle	9702538	9704779	TSPY1	protein_coding	+
	Cattle	9732823	9734957	TSPY1	protein_coding	+
	Cattle	9740364	9742496	TSPY1	protein_coding	+
	Cattle	9747904	9750038	TSPY1	protein_coding	+
	Cattle	9762877	9765116	TSPY1	protein_coding	+
	Cattle	9928679	9930920	TSPY1	protein_coding	+
	Cattle	10109622	10111853	TSPY1	protein_coding	+
	Cattle	10124690	10126921	TSPY1	protein_coding	+
	Cattle	10350027	10352282	TSPY1	protein_coding	+
	Cattle	10380205	10382452	TSPY1	protein_coding	+
	Cattle	12950410	12952634	TSPY1	pseudogene	+
	Cattle	12973008	12975233	TSPY1	pseudogene	+
	Cattle	12987467	12989689	TSPY1	pseudogene	+
	Cattle	13023294	13029277	ZNF280B	protein_coding	-
	Cattle	13052916	13054509	ZNF280A	pseudogene	-
	Cattle	13066530	13105646	ZNF280B	pseudogene	-
	Cattle	13121234	13155375	EIF1AX	pseudogene	-
	Cattle	13737069	13742464	PRAME	protein_coding	+
	Cattle	14108493	14113886	PRAME	protein_coding	+
	Cattle	16687397	16704916	UBA1	pseudogene	-
	Cattle	16781166	16786549	PRAME	protein_coding	+
	Cattle	16816091	16817528	ZNF280B	pseudogene	+
	Cattle	16828520	16830424	TSPY1	pseudogene	-
	Cattle	16875831	16888065	PRAME	protein_coding	+
	Cattle	16926748	16928400	HSFY	pseudogene	+
	Cattle	17047045	17060561	ZNF280B	protein_coding	-
	Cattle	17068351	17082163	ZNF280A	pseudogene	-
	Cattle	17364268	17367822	TSPY1	protein_coding	+
	Cattle	17377297	17378784	ZNF280B	pseudogene	-
	Cattle	17424917	17430128	PRAME	protein_coding	+
	Cattle	17437074	17448742	ZNF280A	pseudogene	+
	Cattle	17451663	17456874	PRAME	protein_coding	-
	Cattle	17503402	17512996	ZNF280B	pseudogene	+
	Cattle	17514015	17517569	TSPY1	protein_coding	-
	Cattle	17550556	17553877	TSPY3	protein_coding	-
	Cattle	17887885	17894122	ZNF280A	pseudogene	-
	Cattle	17901134	17906316	PRAME	protein_coding	-
	Cattle	17952973	17962590	ZNF280B	pseudogene	+
	Cattle	17963609	17967153	TSPY1	protein_coding	-
	Cattle	18231140	18234690	TSPY1	protein_coding	+
	Cattle	18235709	18245263	ZNF280B	pseudogene	-
	Cattle	18291988	18297071	PRAME	protein_coding	+
	Cattle	18304018	18310269	ZNF280A	pseudogene	+
	Cattle	18318637	18323719	PRAME	protein_coding	-
	Cattle	18370086	18371416	ZNF280B	pseudogene	+
	Cattle	18380991	18384554	TSPY1	protein_coding	-
	Cattle	18399540	18403069	TSPY3	protein_coding	-
	Cattle	18415242	18418771	TSPY3	protein_coding	-
	Cattle	18430837	18434271	TSPY3	protein_coding	-
	Cattle	18821733	18823064	ZNF280A	pseudogene	-
	Cattle	18834943	18840188	PRAME	protein_coding	-
	Cattle	18886880	18896454	ZNF280B	pseudogene	+
	Cattle	18897474	18901050	TSPY1	pseudogene	-
	Cattle	18938371	18942011	TSPY3	protein_coding	-
	Cattle	18954070	18957710	TSPY3	protein_coding	-
	Cattle	18969769	18973409	TSPY3	protein_coding	-
	Cattle	18985467	18989107	TSPY3	protein_coding	-
	Cattle	19001166	19004591	TSPY3	protein_coding	-
	Cattle	19016862	19020502	TSPY3	protein_coding	-
	Cattle	19032561	19036201	TSPY3	protein_coding	-
	Cattle	19339207	19345440	ZNF280A	pseudogene	-
	Cattle	19352388	19357778	PRAME	protein_coding	-
	Cattle	19403926	19405368	ZNF280B	pseudogene	+
	Cattle	19414859	19418423	TSPY1	protein_coding	-
	Cattle	19796866	19800421	TSPY1	protein_coding	+
	Cattle	19801440	19810989	ZNF280B	pseudogene	-
	Cattle	19857498	19862726	PRAME	protein_coding	+
	Cattle	19869675	19875906	ZNF280A	pseudogene	+
	Cattle	19884273	19889498	PRAME	protein_coding	-
	Cattle	19935636	19936966	ZNF280B	pseudogene	+
	Cattle	19946598	19950146	TSPY1	protein_coding	-
	Cattle	21033471	21037030	TSPY1	protein_coding	+
	Cattle	21046504	21047991	ZNF280B	pseudogene	-
	Cattle	21107030	21113285	ZNF280A	pseudogene	+
	Cattle	21648882	21652382	TSPY3	protein_coding	+
	Cattle	21669364	21672928	TSPY1	protein_coding	+
	Cattle	21673947	21683529	ZNF280B	pseudogene	-
	Cattle	21730444	21735783	PRAME	protein_coding	+
	Cattle	21744151	21751936	ZNF280A	pseudogene	-
	Cattle	21758958	21764245	PRAME	protein_coding	-
	Cattle	21811450	21812640	ZNF280B	pseudogene	+
	Cattle	21821980	21825543	TSPY1	protein_coding	-
	Cattle	22029414	22032986	TSPY1	protein_coding	+
	Cattle	22033944	22043391	ZNF280B	pseudogene	-
	Cattle	22103390	22109655	ZNF280A	pseudogene	+
	Cattle	22118032	22123288	PRAME	protein_coding	-
	Cattle	22170101	22171158	ZNF280B	pseudogene	+
	Cattle	22180566	22184148	TSPY1	pseudogene	-
	Cattle	22216844	22220493	TSPY3	protein_coding	-
	Cattle	22248246	22251884	TSPY3	protein_coding	-
	Cattle	22263819	22267472	TSPY3	protein_coding	-
	Cattle	22831062	22834631	TSPY1	protein_coding	+
	Cattle	22844113	22845579	ZNF280B	pseudogene	-
	Cattle	22892353	22897570	PRAME	protein_coding	+
	Cattle	22904515	23042746	ZNF280A	pseudogene	+
	Cattle	23048127	23051749	TSPY3	protein_coding	+
	Cattle	23055869	23056806	OR4C3D	pseudogene	+
	Cattle	23073978	23074896	OR4C3D	pseudogene	+
	Cattle	23093760	23094689	OR4C6	protein_coding	+
	Cattle	23124168	23124826	LOC132344651	lncRNA	-
	Cattle	23229408	23332043	TXLNG	protein_coding	-
	Cattle	23570351	23572076	HSFY	pseudogene	-
	Cattle	23622137	23631799	XR_009493653.1		+
	Cattle	23622137	23634409	LOC132344516	lncRNA	+
	Cattle	23987118	23989508	SHROOM2	pseudogene	+
	Cattle	23998913	24016917	ZNF280B	pseudogene	-
	Cattle	24036392	24037129	ZNF280A	pseudogene	-
	Cattle	24121952	24123646	ZNF280A	pseudogene	+
	Cattle	24170987	24171562	TSPY1	pseudogene	-
	Cattle	24286123	24288248	TSPY1	pseudogene	-
	Cattle	24365794	24367588	HSFY	protein_coding	-
	Cattle	24442280	24442822	TSPY1	protein_coding	+
	Cattle	24469013	24469540	TSPY1	protein_coding	-
	Cattle	24524743	24558352	ZNF280B	protein_coding	-
	Cattle	24661639	24663580	TSPY1	protein_coding	-
	Cattle	24728184	24728759	TSPY1	protein_coding	-
	Cattle	24806179	24881436	TSPY1	pseudogene	+
	Cattle	25098599	25100766	TSPY1	pseudogene	-
	Cattle	25170370	25172099	HSFY	protein_coding	+
	Cattle	25189455	25201782	PRAME	protein_coding	-
	Cattle	25210799	25223120	PRAME	protein_coding	-
	Cattle	25232135	25244452	PRAME	protein_coding	-
	Cattle	25253465	25265775	PRAME	protein_coding	-
	Cattle	25274793	25287119	PRAME	protein_coding	-
	Cattle	25296144	25308471	PRAME	protein_coding	-
	Cattle	25317513	25329830	PRAME	protein_coding	-
	Cattle	25338829	25345478	PRAME	protein_coding	-
	Cattle	25345548	25348056	PRAME	protein_coding	+
	Cattle	25355837	25362481	PRAME	protein_coding	-
	Cattle	25362551	25365112	PRAME	protein_coding	+
	Cattle	25374188	25386424	PRAME	protein_coding	+
	Cattle	25395401	25408614	PRAME	protein_coding	+
	Cattle	25416725	25429053	PRAME	protein_coding	+
	Cattle	25445725	25448149	HSFY	protein_coding	-
	Cattle	25517743	25519910	TSPY1	pseudogene	+
	Cattle	25727185	25782253	TSPY1	pseudogene	-
	Cattle	25826189	25826716	TSPY1	protein_coding	+
	Cattle	25851473	25852835	TSPY1	protein_coding	-
	Cattle	25929369	25931228	HSFY	protein_coding	+
	Cattle	26207803	26209609	HSFY	protein_coding	+
	Cattle	26299523	26301679	TSPY1	pseudogene	+
	Cattle	26805161	26806920	HSFY	protein_coding	+
	Cattle	27483919	27485667	HSFY	protein_coding	+
	Cattle	27783134	27784898	HSFY	protein_coding	-
	Cattle	27910512	27912483	TSPY1	pseudogene	-
	Cattle	27980393	27990926	LOC132344542	pseudogene	+
	Cattle	28288469	28290592	TSPY1	protein_coding	-
	Cattle	28450254	28451721	HSFY	protein_coding	+
	Cattle	28749542	28750264	HSFY	protein_coding	-
	Cattle	28864373	28875413	ZNF280B	protein_coding	-
	Cattle	29675810	29677287	HSFY	protein_coding	+
	Cattle	29846127	29847875	HSFY	protein_coding	-
	Cattle	30323349	30334426	ZNF280B	protein_coding	-
	Cattle	30535268	30537061	ZNF280B	protein_coding	-
	Cattle	30844163	30853345	LOC132344543	pseudogene	-
	Cattle	30872713	30874556	ZNF280B	protein_coding	-
	Cattle	31101619	31112538	ZNF280B	protein_coding	+
	Cattle	31218296	31220868	HSFY	protein_coding	+
	Cattle	31526575	31527214	HSFY	protein_coding	-
	Cattle	31855579	31857700	TSPY1	protein_coding	-
	Cattle	32293276	32295609	HSFY	protein_coding	+
	Cattle	32593470	32594153	HSFY	protein_coding	-
	Cattle	33040068	33040790	HSFY	protein_coding	-
	Cattle	33091412	33092134	HSFY	protein_coding	-
	Cattle	33183479	33185329	HSFY2	protein_coding	+
	Cattle	33987334	33988044	HSFY	protein_coding	-
	Cattle	34348601	34359672	ZNF280B	protein_coding	+
	Cattle	34473936	34474538	HSFY	protein_coding	+
	Cattle	35136000	35145181	LOC132344546	pseudogene	-
	Cattle	35810020	35810742	HSFY	protein_coding	-
	Cattle	36344638	36345170	HSFY	protein_coding	-
	Cattle	36673445	36675566	TSPY1	protein_coding	-
	Cattle	36740759	36749951	LOC132344547	pseudogene	+
	Cattle	37111128	37111691	HSFY	protein_coding	+
	Cattle	37410112	37411804	HSFY	protein_coding	-
	Cattle	37867347	37868069	HSFY	protein_coding	+
	Cattle	40442061	40443753	HSFY	protein_coding	-
	Cattle	42049910	42060967	ZNF280B	protein_coding	+
	Cattle	42175252	42176944	HSFY	protein_coding	+
	Cattle	42768700	42777883	LOC132344548	pseudogene	-
	Cattle	44241583	44250761	LOC132344549	pseudogene	-
	Cattle	44615699	44618119	HSFY	protein_coding	+
	Cattle	45559785	45570718	ZNF280B	protein_coding	+
	Cattle	45676468	45678265	HSFY	protein_coding	+
	Cattle	46090960	46092922	ZNF280B	protein_coding	-
	Cattle	46322860	46333894	ZNF280B	protein_coding	+
	Cattle	46599445	46610499	ZNF280B	protein_coding	+
	Cattle	50079955	50090988	ZNF280B	protein_coding	-
	Cattle	50734943	50737396	HSFY	protein_coding	-
	Cattle	51301257	51312320	ZNF280B	protein_coding	+
	Cattle	51725598	51727065	HSFY	protein_coding	-
	Cattle	51841331	51852382	LOC132344709	lncRNA	-
	Cattle	54060688	54247045	HSFY	protein_coding	+
	Cattle	54359172	54361505	HSFY	protein_coding	-
	Cattle	54739626	54798897	TSPY1	protein_coding	+
	Cattle	55607354	55618375	ZNF280B	protein_coding	-
	Cattle	55839089	55850164	ZNF280B	protein_coding	+
	Cattle	56281008	56292095	ZNF280B	protein_coding	+
	Cattle	56727130	56738191	ZNF280B	protein_coding	+
	Cattle	56845052	56847001	HSFY	protein_coding	+
	Cattle	57052227	57053758	HSFY	protein_coding	+
	Cattle	57222793	57224657	HSFY	protein_coding	-
	Cattle	57331387	57342459	ZNF280B	protein_coding	-
	Cattle	57687938	57698996	ZNF280B	protein_coding	+
	Cattle	57703319	57703846	TSPY1	protein_coding	+
	Cattle	57804860	57806697	HSFY	protein_coding	+
	Cattle	58122906	58123595	SRY	protein_coding	-
	Cattle	58162079	58274819	LOC132344720	lncRNA	+
	Cattle	58378234	58397303	SHROOM2	pseudogene	-
	Cattle	58581048	58585874	SHROOM2	pseudogene	-
	Cattle	58871395	58871892	HSFY	pseudogene	+
	Cattle	59015230	59023731	PLCXD1	pseudogene	-
	Cattle	59141089	59142041	EI24	pseudogene	-
	Cattle	59144453	59157810	RBMY	protein_coding	+
	Cattle	59165027	59165979	EI24	pseudogene	-
	Cattle	59170802	59181748	RBMY	protein_coding	+
	Cattle	59188965	59189917	EI24	pseudogene	-
	Cattle	59194740	59205686	RBMY	protein_coding	+
	Cattle	59212903	59213855	EI24	pseudogene	-
	Cattle	59218678	59229625	RBMY	protein_coding	+
	Cattle	59236843	59237795	EI24	pseudogene	-
	Cattle	59240207	59253561	RBMY	protein_coding	+
	Cattle	59260778	59261730	EI24	pseudogene	-
	Cattle	59266554	59277500	RBMY	protein_coding	+
	Cattle	59284716	59285668	EI24	pseudogene	-
	Cattle	59290496	59301437	RBMY	protein_coding	+
	Cattle	59308661	59309613	EI24	pseudogene	-
	Cattle	59314438	59325385	RBMY	protein_coding	+
	Cattle	59332601	59333553	EI24	pseudogene	-
	Cattle	59338378	59349319	RBMY	protein_coding	+
	Cattle	59356536	59357488	EI24	pseudogene	-
	Cattle	59362313	59373255	RBMY	protein_coding	+
	Cattle	59383835	59397196	RBMY	protein_coding	+
	Cattle	59458669	59459386	PSMB6	pseudogene	+

## Sheet: Table SS6
Table S6: NCBI annotation of the sheep T2T Y-chromosome
The gene names (when available) of the originally annotated "LOC…" genes have been used.
	chr	start	end	gene	type	strand
	Sheep	33740	46817	PLCXD1	protein_coding	+			PAR
	Sheep	35647	37007	LOC121818143	lncRNA	-			X-degenerate
	Sheep	39231	40028	LOC114111250	lncRNA	-			Ampliconic
	Sheep	50367	60402	GTPBP6	protein_coding	-
	Sheep	64883	112517	PPP2R3B	protein_coding	-
	Sheep	300796	311939	SHOX	protein_coding	+
	Sheep	624611	644545	CRLF2	protein_coding	-
	Sheep	648333	659213	LOC121818236	lncRNA	-
	Sheep	659343	669438	LOC132659050	lncRNA	+
	Sheep	665400	669576	LOC132659051	lncRNA	-
	Sheep	669638	697205	CSF2RA	protein_coding	+
	Sheep	703802	729734	CSF2RA	protein_coding	+
	Sheep	725372	727799	LOC121818233	lncRNA	-
	Sheep	735440	754882	IL3RA	protein_coding	+
	Sheep	757533	761608	SLC25A6	protein_coding	-
	Sheep	767432	786538	ASMTL	protein_coding	-
	Sheep	780087	783684	LOC121818231	lncRNA	+
	Sheep	786855	789103	PRB1	protein_coding	-	LOC132658878	basic salivary proline-rich protein 1-like
	Sheep	791874	845889	P2RY8	protein_coding	-
	Sheep	865121	866778	LOC132658844	lncRNA	+
	Sheep	869149	879837	AKAP17A	protein_coding	+
	Sheep	892332	918274	ASMTL	protein_coding	+
	Sheep	1037814	1117365	SF3A2	protein_coding	-	LOC106990378
	Sheep	1116340	1117365	RIC1-RGP1	protein_coding	-	LOC132658879	guanine nucleotide exchange factor subunit RIC1-like
	Sheep	1126173	1264555	DHRSX	protein_coding	-
	Sheep	1245070	1264555	ZBED1	protein_coding	-
	Sheep	1258275	1258403	RU109	snoRNA	+
	Sheep	1293319	1307995	LOC114111205	lncRNA	-
	Sheep	1335628	1368952	CD99	protein_coding	+
	Sheep	1372266	1398693	XG	protein_coding	+
	Sheep	1404595	1428408	GYG2	protein_coding	+
	Sheep	1405817	1406684	LOC121818159	lncRNA	+
	Sheep	1433967	1450302	ARSD	protein_coding	-
	Sheep	1448571	1472774	ARSL	protein_coding	-
	Sheep	1448785	1499748	ARSH	protein_coding	+
	Sheep	1530788	1539094	LOC132658829	lncRNA	+
	Sheep	1557358	1558558	LOC132658956	lncRNA	+
	Sheep	1580195	1608920	MXRA5	protein_coding	-
	Sheep	1642092	1649252	LOC132659049	lncRNA	-
	Sheep	1662200	1694596	LOC105605321	lncRNA	-
	Sheep	1708052	1792228	PRKX	protein_coding	-
	Sheep	2055359	2183776	LOC105605322	lncRNA	-
	Sheep	2204671	2228867	ZNF160	protein_coding	-
	Sheep	2418485	2418556	TRNAW	tRNA	-
	Sheep	2507924	2517121	OBP	protein_coding	+
	Sheep	2538723	2544175	LOC114111737	lncRNA	+
	Sheep	2600308	2607694	LOC114111318	lncRNA	+
	Sheep	2612450	2624131	OBP	protein_coding	+
	Sheep	2647353	2654804	OBP	protein_coding	+
	Sheep	2674154	2675390	PRELID1	protein_coding	+	LOC114111162	PRELI domain-containing protein 1%2C mitochondrial-like
	Sheep	2720718	2737797	OBP	protein_coding	+
	Sheep	2757310	2765214	LOC132658957	lncRNA	+
	Sheep	2964862	2972166	BOS2D	protein_coding	+
	Sheep	2991500	3065663	BOS2D	protein_coding	+
	Sheep	3072414	3078782	BOS2D	protein_coding	+
	Sheep	3081975	3088847	BOS2D	protein_coding	+
	Sheep	3576869	3977696	NLGN4X	protein_coding	-
	Sheep	4605380	4662781	PUDP	protein_coding	-
	Sheep	4661991	4889079	STS	protein_coding	+
	Sheep	4820400	4820472	TRNAC	tRNA	+
	Sheep	4908433	4908539	RNU6-1	snRNA	-
	Sheep	5292393	5292935	HINT1	protein_coding	-	LOC114111378	adenosine 5'-monophosphoramidase HINT1-like
	Sheep	5324609	5379338	PNPLA4	protein_coding	-
	Sheep	5379157	5822358	PRB3	protein_coding	+
	Sheep	5420920	5420992	TRNAE	tRNA	-
	Sheep	5488886	5488957	TRNAW	tRNA	-
	Sheep	5545345	5545449	RNU6-1	snRNA	+
	Sheep	5851521	6071455	ANOS1	protein_coding	-
	Sheep	6599536	6620781	LOC105605337	lncRNA	-
	Sheep	6638267	6640559	LOC132658838	lncRNA	+
	Sheep	6731620	6979460	TBL1X	protein_coding	+
	Sheep	6984028	7014882	GPR143	protein_coding	-
	Sheep	7027903	7056111	LOC132658880	protein_coding	+
	Sheep	7062272	7063914	CHP2	protein_coding	-
	Sheep	7098104	7104701	AMELY	protein_coding	+
	Sheep	7214387	7298892	OFD1	protein_coding	+
	Sheep	7236492	7236597	RNU6-1	snRNA	-
	Sheep	7285321	7285425	RNU6-1	snRNA	+
	Sheep	7386786	7527683	USP9X	protein_coding	-
	Sheep	7511961	7512032	TRNAS	tRNA	+
	Sheep	7560123	7616629	ZRSR2Y	protein_coding	-
	Sheep	7570197	7571268	ARPC1A	pseudogene	+
	Sheep	7621448	7660822	GPM6B	pseudogene	+
	Sheep	7644280	7650366	USP9X	protein_coding	+
	Sheep	7692585	7859400	KDM6A	protein_coding	-
	Sheep	7886481	7899914	DDX3X	protein_coding	-
	Sheep	7941038	7952870	LOC132659054	lncRNA	+
	Sheep	8172446	8220698	ZMYND8	pseudogene	+
	Sheep	8223963	8227292	TSPY3	pseudogene	-
	Sheep	8313090	8400684	LOC132659060	lncRNA	-
	Sheep	8409837	8490522	ZFY	protein_coding	-
	Sheep	8426950	8427032	RNU4-1	pseudogene	+
	Sheep	8508157	8553310	EIF2S3	protein_coding	-
	Sheep	8574919	8715993	SHROOM2	protein_coding	-
	Sheep	8584062	8584133	TRNAR	tRNA	-
	Sheep	8717200	8727463	LOC121818179	lncRNA	+
	Sheep	8738973	8752713	LOC132659063	lncRNA	+
	Sheep	8878673	8988400	TSPY3	pseudogene	+
	Sheep	9042967	9046504	TSPY3	pseudogene	+
	Sheep	9071989	9083121	TSPY3	pseudogene	-
	Sheep	9119451	9183876	ZMYND8	pseudogene	+
	Sheep	9159692	9163211	TSPY3	pseudogene	-
	Sheep	9236976	9292656	TSPY3	pseudogene	-
	Sheep	9332311	9336631	TSPY3	pseudogene	-
	Sheep	9337111	9394462	ZMYND8	pseudogene	+
	Sheep	9356519	9359696	TSPY3	protein_coding	-
	Sheep	9397767	9398771	COMMD2	protein_coding	+
	Sheep	9443171	9532147	ZMYND8	pseudogene	-
	Sheep	9512679	9515860	TSPY3	protein_coding	+
	Sheep	9535472	9603099	TSPY3	pseudogene	+
	Sheep	9776239	9866212	TSPY1	pseudogene	-
	Sheep	9873493	9944804	ZMYND8	pseudogene	+
	Sheep	9978116	10031757	ZMYND8	pseudogene	-
	Sheep	10012957	10016127	TSPY3	protein_coding	+
	Sheep	10033344	10035400	GTBP1	protein_coding	+
	Sheep	10037892	10041801	TSPY3	pseudogene	+
	Sheep	10273384	10361219	ZMYND8	pseudogene	-
	Sheep	10294251	10297788	TSPY3	pseudogene	+
	Sheep	10371736	10382870	TSPY3	pseudogene	+
	Sheep	10407401	10410585	TSPY3	protein_coding	-
	Sheep	10492510	10581102	ZMYND8	pseudogene	-
	Sheep	10560300	10563481	TSPY3	protein_coding	+
	Sheep	10581582	10585906	TSPY3	pseudogene	+
	Sheep	10609613	10630432	TSPY3	pseudogene	+
	Sheep	10749954	10754371	TSPY3	pseudogene	+
	Sheep	10810630	10815617	TSPY3	pseudogene	-
	Sheep	10878883	10883300	TSPY3	pseudogene	-
	Sheep	10983034	10987672	TSPY3	pseudogene	+
	Sheep	11038142	11039719	TSPY3	pseudogene	-
	Sheep	11103903	11105920	RPF2	protein_coding	+
	Sheep	11180698	11184086	TSPY3	pseudogene	-
	Sheep	11211858	11220145	LOC132658901	pseudogene	+
	Sheep	11588107	11597900	TSPY1	pseudogene	+
	Sheep	11602141	11604261	TSPY1	pseudogene	+
	Sheep	11610599	11615152	ZNF280B	pseudogene	-
	Sheep	11641182	11642863	ZNF280A	pseudogene	-
	Sheep	11654632	11660199	PRAME	pseudogene	-
	Sheep	11678006	11679283	ZNF280B	pseudogene	-
	Sheep	11688484	11690150	HSFY	protein_coding	+
	Sheep	11859817	11863082	PLCXD1	pseudogene	-
	Sheep	11868030	11869687	ZNF280A	pseudogene	+
	Sheep	11891305	11909175	ZNF280B	pseudogene	+
	Sheep	11924724	11926371	ZNF280A	pseudogene	-
	Sheep	11936576	11942122	PRAME	pseudogene	-
	Sheep	11956040	11968206	PRAME	pseudogene	-
	Sheep	12053621	12055263	ZNF280A	pseudogene	+
	Sheep	12108407	12110140	HSFY	protein_coding	+
	Sheep	12313796	12316765	HSFY	protein_coding	+
	Sheep	12436499	12440711	HSFY	pseudogene	-
	Sheep	12500030	12500102	TRNAK	tRNA	+
	Sheep	12527802	12530674	TSPY1	pseudogene	+
	Sheep	12534282	12535511	TSPY1	pseudogene	+
	Sheep	12545969	12547535	ZNF280B	pseudogene	-
	Sheep	12569761	12572401	ZNF280A	pseudogene	-
	Sheep	12611518	12613107	HSFY	pseudogene	-
	Sheep	12673269	12676549	TSPY1	pseudogene	-
	Sheep	12678738	12680952	TSPY1	pseudogene	-
	Sheep	12685832	12734821	TSPY1	pseudogene	-
	Sheep	12695631	12732523	EIF1AY	protein_coding	-
	Sheep	12738887	12746167	TSPY1	pseudogene	-
	Sheep	12748313	12838277	TSPY1	pseudogene	-
	Sheep	12765519	12767991	ZNF280A	pseudogene	-
	Sheep	12807300	12808996	ZNF280A	pseudogene	+
	Sheep	12825426	12826695	ZNF280B	pseudogene	+
	Sheep	12842174	12844390	TSPY1	pseudogene	-
	Sheep	12891408	12902983	TSPY1	pseudogene	+
	Sheep	12904335	13502691	TSPY1	pseudogene	+
	Sheep	12916206	12918338	ZNF280B	pseudogene	-
	Sheep	12942630	12945794	PRAME	pseudogene	-
	Sheep	12953259	13000545	HSFY	pseudogene	-
	Sheep	13013630	13022266	LOC132658874	pseudogene	-
	Sheep	13171518	13173178	HSFY	protein_coding	-
	Sheep	13289430	13291098	HSFY	protein_coding	+
	Sheep	13350924	13370020	LOC132659076	lncRNA	+
	Sheep	13508274	13514635	TSPY1	pseudogene	+
	Sheep	13514739	13516116	TSPY1	pseudogene	+
	Sheep	13526423	13527716	ZNF280B	pseudogene	-
	Sheep	13542105	13556013	ZNF280A	pseudogene	-
	Sheep	13597472	13611380	ZNF280A	pseudogene	+
	Sheep	13625777	13627266	ZNF280B	pseudogene	+
	Sheep	13637213	13645207	TSPY1	pseudogene	-
	Sheep	13650790	14021482	TSPY1	pseudogene	-
	Sheep	13660711	13678947	EIF1AX	pseudogene	-
	Sheep	13784084	13803408	LOC132658974	lncRNA	-
	Sheep	13863068	13864736	HSFY	protein_coding	-
	Sheep	13915376	13917066	ZNF280A	pseudogene	-
	Sheep	13990032	13991712	ZNF280A	pseudogene	+
	Sheep	14006937	14008262	ZNF280B	pseudogene	+
	Sheep	14025745	14027956	TSPY1	pseudogene	-
	Sheep	14044548	14063537	EIF1AX	pseudogene	-
	Sheep	14116069	14117733	HSFY	pseudogene	+
	Sheep	14175089	14190863	LOC132658978	lncRNA	+
	Sheep	14204416	14208669	HSFY	pseudogene	-
	Sheep	14220443	14246598	PLCXD1	pseudogene	+
	Sheep	14383663	14385393	HSFY	protein_coding	-
	Sheep	14685889	14697169	UBA1	pseudogene	+
	Sheep	14697754	14704369	TSPY1	pseudogene	-
	Sheep	14718902	14719807	ZNF280A	pseudogene	-
	Sheep	14732201	14745284	PRAME	pseudogene	-
	Sheep	14747347	14748633	ZNF280B	pseudogene	-
	Sheep	14758536	14768421	ZNF280A	pseudogene	-
	Sheep	14779659	14784023	PRAME	protein_coding	-
	Sheep	14804782	14806052	ZNF280B	pseudogene	-
	Sheep	14820666	14821329	ZNF280A	pseudogene	-
	Sheep	14832536	14833162	TSPY1	pseudogene	-
	Sheep	14837858	14847428	TSPY1	pseudogene	-
	Sheep	14856923	14857828	ZNF280A	pseudogene	-
	Sheep	14992855	15000421	LOC132659085	lncRNA	-
	Sheep	15014557	15035319	UBA1	pseudogene	+
	Sheep	15035391	15072384	TSPY1	pseudogene	-
	Sheep	15072669	15079872	TSPY1	pseudogene	+
	Sheep	15097822	15099444	ZNF280B	pseudogene	-
	Sheep	15104006	15104508	HSFY	pseudogene	-
	Sheep	15175507	15182552	EIF1AX	pseudogene	-
	Sheep	15217529	15221738	HSFY	pseudogene	+
	Sheep	15325892	15327560	HSFY	protein_coding	-
	Sheep	15394744	15395405	ZNF280A	pseudogene	+
	Sheep	15410291	15411624	ZNF280B	protein_coding	+
	Sheep	15421973	15423223	TSPY1	pseudogene	-
	Sheep	15433592	15434393	ZNF280B	pseudogene	-
	Sheep	15450096	15450801	ZNF280A	pseudogene	-
	Sheep	15517940	15519608	HSFY	protein_coding	+
	Sheep	15625809	15629931	HSFY	pseudogene	-
	Sheep	15702674	15704375	ZNF280A	pseudogene	+
	Sheep	15734011	15735308	ZNF280B	pseudogene	+
	Sheep	15745921	15747171	TSPY1	pseudogene	-
	Sheep	15747403	15753493	TSPY1	pseudogene	-
	Sheep	15769086	15786956	EIF1AX	pseudogene	-
	Sheep	15828230	15832435	HSFY	pseudogene	+
	Sheep	15971093	15972823	HSFY	protein_coding	-
	Sheep	16031690	16033333	ZNF280A	pseudogene	-
	Sheep	16095558	16097201	ZNF280A	pseudogene	+
	Sheep	16156363	16158094	HSFY	protein_coding	+
	Sheep	16281921	16286267	HSFY	pseudogene	-
	Sheep	16323001	16330614	TSPY1	pseudogene	+
	Sheep	16341027	16342317	ZNF280B	pseudogene	-
	Sheep	16357635	16359330	ZNF280A	pseudogene	-
	Sheep	16448456	16449290	TSPY1	pseudogene	+
	Sheep	16454921	16457117	TSPY1	pseudogene	+
	Sheep	16457834	16459954	TSPY1	pseudogene	-
	Sheep	16542261	16550924	LOC132658998	lncRNA	-
	Sheep	16620343	16634142	LOC132658999	protein_coding	+
	Sheep	16932877	16946563	BCORL1	pseudogene	-
	Sheep	17199770	17201967	SRY	protein_coding	+
	Sheep	17352452	17352558	RNU6-1	snRNA	+
	Sheep	17370371	17371738	TSPY1	pseudogene	+
	Sheep	17379962	17382341	HSFY	pseudogene	+
	Sheep	17452322	17454188	HSFY	pseudogene	+
	Sheep	17461328	17476342	HSFY	pseudogene	+
	Sheep	17489197	17512114	ZNF280A	pseudogene	+
	Sheep	17586690	17588640	HSFY	pseudogene	-
	Sheep	17627371	17629039	HSFY	protein_coding	-
	Sheep	17655543	17657168	ZNF280B	protein_coding	-
	Sheep	17796922	17798111	TSPY1	pseudogene	+
	Sheep	17869607	17879690	TSPY1	pseudogene	-
	Sheep	17965116	17966708	ZNF280B	protein_coding	+
	Sheep	17973307	17977021	TSPY1	pseudogene	-
	Sheep	17973956	17974555	TSPY1	pseudogene	-
	Sheep	18075417	18077009	ZNF280B	protein_coding	-
	Sheep	18156960	18157499	TSPY1	pseudogene	+
	Sheep	18248214	18248753	TSPY1	pseudogene	+
	Sheep	18448953	18449492	TSPY1	pseudogene	+
	Sheep	18456728	18458347	ZNF280B	protein_coding	-
	Sheep	18528180	18529775	ZNF280B	protein_coding	+
	Sheep	18540176	18540715	TSPY1	pseudogene	+
	Sheep	18644089	18645681	ZNF280B	protein_coding	-
	Sheep	18727185	18729051	TSPY1	pseudogene	-
	Sheep	18820045	18821233	TSPY1	pseudogene	+
	Sheep	18824101	18830926	ZNF280B	protein_coding	-
	Sheep	18921444	18923041	ZNF280B	protein_coding	-
	Sheep	19159331	19160923	ZNF280B	protein_coding	+
	Sheep	19177486	19179078	ZNF280B	protein_coding	-
	Sheep	19338005	19339597	ZNF280B	protein_coding	+
	Sheep	19636799	19638391	ZNF280B	protein_coding	-
	Sheep	19720964	19724045	ZNF280B	protein_coding	-
	Sheep	20176874	20178740	TSPY1	pseudogene	-
	Sheep	20314985	20316574	ZNF280B	protein_coding	+
	Sheep	20398544	20400136	ZNF280B	protein_coding	+
	Sheep	20742001	20743573	ZNF280B	protein_coding	+
	Sheep	20750175	20752041	TSPY1	pseudogene	-
	Sheep	20887008	20888630	ZNF280B	protein_coding	+
	Sheep	20905069	20906666	ZNF280B	protein_coding	-
	Sheep	21170808	21172379	ZNF280B	protein_coding	+
	Sheep	21248825	21250691	TSPY1	pseudogene	+
	Sheep	21578318	21580184	TSPY1	pseudogene	-
	Sheep	21715149	21716770	ZNF280B	protein_coding	+
	Sheep	21733210	21734807	ZNF280B	protein_coding	-
	Sheep	21998871	22000442	ZNF280B	protein_coding	+
	Sheep	22097724	22099590	TSPY1	pseudogene	+
	Sheep	22326361	22327953	ZNF280B	protein_coding	-
	Sheep	22408183	22465106	TSPY1	pseudogene	+
	Sheep	22488219	22489814	ZNF280B	protein_coding	+
	Sheep	22674992	22676587	ZNF280B	protein_coding	+
	Sheep	22768187	22770053	TSPY1	pseudogene	-
	Sheep	23044510	23056551	ZNF280B	protein_coding	-
	Sheep	23550870	23552736	TSPY1	pseudogene	+
	Sheep	23651537	23652076	TSPY1	pseudogene	+
	Sheep	24296182	24296721	TSPY1	pseudogene	+
	Sheep	24562952	24563554	TSPY1	pseudogene	-
	Sheep	25850647	25851785	EI24	pseudogene	-
	Sheep	25873956	25882596	RBMY	protein_coding	+

## Sheet: Table SS7
Table S7: Comparison of the protein-coding genes in the PARs on the X- and Y-chromosomes of cattle and sheep
Cattle								Sheep
X-chromosome				Y-chromosome				X-chromosome				Y-chromosome				Key
start	end	gene		start	end	gene		start	end	gene		start	end	gene			Grey region missing on the cattle X-chromosome
				34576	50731	PLCXD1		7336698	7357354	PLCXD1		33740	46817	PLCXD1		Gene	Gene order not preserved between the X- and Y-chromosome PARs
				54425	62973	GTPBP6		7330773	7340633	GTPBP6		50367	60402	GTPBP6		Gene	Gene missing on either X- or Y-chromosome PAR
				67594	108565	PPP2R3B		7280487	7326315	PPP2R5B		64883	112517	PPP2R3B		Gene	Differences due to gene copy number
				287024	298821	SHOX		7250029	7251886	RIC1-RGP1
				607727	626421	CRLF2		7084535	7095662	SHOX		300796	311939	SHOX
				641983	709113	CSF2RA		6738965	6774475	CRLF2		624611	644545	CRLF2
				714844	734090	IL3RA		6704539	6739921	CSF2RA		669638	697205	CSF2RA
				736218	740740	SLC25A6		6672348	6698087	CSF2RAL		703802	729734	CSF2RA
				746117	767494	ASMTL		6647391	6666577	IL3RA		735440	754882	IL3RA
				770056	818420	P2RY8		6640595	6644670	SLC25A6		757533	761608	SLC25A6
				831192	840371	LOC112445918		6617616	6640066	LOC132658845
				838565	849342	AKAP17A		6614743	6634760	ASMTL		767432	786538	ASMTL
138855826	138873017	ZBED1		1024474	1248196	DHRSX						786855	789103	PRB1
138855826	139007630	DHRSX		1231077	1248196	ZBED1		6556242	6613171	P2RY8		791874	845889	P2RY8
138811208	138826058	LOC132344373		1278119	1292965	LOC132344373		6521952	6532900	AKAP17A		869149	879837	AKAP17A
138754708	138784885	CD99		1319379	1349633	CD99		6484197	6509510	ASMT		892332	918274	ASMTL
138719158	138751817	XG		1352524	1385156	XG						1037814	1117365	SF3A2
138688334	138714565	GYG2		1389142	1415578	GYG2						1116340	1117365	RIC1-RGP1
138668181	138683869	ARSD		1420043	1435771	ARSD		6132795	6152303	ZBED1		1126173	1264555	DHRSX
138650117	138652291	LOC104970184						6132795	6270455	DHRSX		1245070	1264555	ZBED1
138642931	138665834	ARSL		1434360	1487950	ARSH		6026706	6059969	CD99		1335628	1368952	CD99
138618378	138669598	ARSH		1438113	1459455	ARSL		5996698	6025851	XG		1372266	1398693	XG
138512144	138541697	MXRA5		1565250	1594372	MXRA5		5966493	5990448	GYG2		1404595	1428408	GYG2
138331356	138391181	PRKX		1715307	1775120	PRKX		5944857	5961419	ARSD		1433967	1450302	ARSD
137593616	137604282	LOC100847998						5922763	5943451	ARSL		1448571	1472774	ARSL
				2502559	2513187	BOS2D		5896012	5946068	ARSH		1448785	1499748	ARSH
137558002	137564013	OBPL		2542823	2548809	OBP		5786355	5815494	MXRA5		1580195	1608920	MXRA5
137507978	137519336	OBPL		2639655	2648325	OBP		5600733	5680365	PRKX		1708052	1792228	PRKX
137458465	137467123	OBP		2846242	2850132	BOS2D		5171891	5243251	ZNF160L		2204671	2228867	ZNF160
137397672	137407655	OBPL		2929133	2936001	OBP		4884835	4894036	OBP		2507924	2517121	OBP
137255137	137260584	BOS2D						4777838	4789525	OBPL		2612450	2624131	OBP
137182426	137188238	BDA20						4747163	4754615	OBPL		2647353	2654804	OBP
137170869	137177739	OBPL						4727095	4728342	PRELID1		2674154	2675390	PRELID1
136305915	136697112	NLGN4X		3414886	3809870	NLGN4X		4658024	4681795	OBPL		2720718	2737797	OBP
135627414	135693953	PUDP		4424918	4491974	PUDP		4639212	4648340	OBPL
135461328	135628167	STS		4491221	4654535	STS		4432053	4439358	BOSD2L		2964862	2972166	BOS2D
134902551	134964252	PNPLA4		5164225	5208620	PNPLA4		4338577	4412720	BOSD2L		2991500	3065663	BOS2D
134410909	134904237	LOC101902122		5207061	5260468	LOC101902122		4325460	4331828	BOSD2L		3072414	3078782	BOS2D
134225178	134436095	ANOS1		5684801	5895644	ANOS1		4315395	4322267	BOSD2		3081975	3088847	BOS2D
133338879	133585555	TBL1X		6537172	6782468	TBL1X		3429658	3829836	NLGN4X		3576869	3977696	NLGN4X
133303485	133333183	GPR143		6789255	6818929	GPR143		2743179	2800393	PUDP		4605380	4662781	PUDP
								2518144	2743966	STS		4661991	4889079	STS
								2116811	2117350	HINT1		5292393	5292935	HINT1
								2030504	2085233	PNPLA4		5324609	5379338	PNPLA4
												5379157	5822358	PRB3
								1336534	1558611	ANOS1		5851521	6071455	ANOS1
								435005	683921	TBL1X		6731620	6979460	TBL1X
								399628	430432	GPR143		6984028	7014882	GPR143

## Sheet: Table SS8
Table S8: Ampliconic gene families on the cattle and the sheep Y-chromosomes
	Ampliconic genes copy number						Ampliconic genes copy number grouped by family						Protein-coding-to-pseudogene ratio of the ampliconic genes families
	Gene	Cattle	Sheep				Gene	Cattle	Sheep				Gene family	Cattle	Sheep
	HSFY	37	12	pCoding			HSFY	37	12	pCoding			HSFY	13	0.857143
	HSFY2	2	0	pCoding			HSFY2	2	0	pCoding			PRAME	31	0.2
	PRAME	31	1	pCoding				39	12	pCoding			TSPY	6	0.0704225
	RBMY	11	1	pCoding			PRAME	31	1	pCoding			RBMY	11	1
	TSPY1	68	0	pCoding			RBMY	11	1	pCoding			ZNF280	0.666667	0.72973
	TSPY3	16	5	pCoding			TSPY1	68	0	pCoding
	ZNF280B	22	27	pCoding			TSPY3	16	5	pCoding
	ZNF280A	0	0	pCoding				84	5	pCoding
		187	46				ZNF280B	22	27	pCoding
							ZNF280A	0	0	pCoding
								22	27
	Gene	Cattle	Sheep				Gene	Cattle	Sheep
	HSFY	3	14	pseudogene			HSFY	3	14	pseudogene
	HSFY2	0	0	pseudogene			HSFY2	0	0	pseudogene
	PRAME	0	5	pseudogene				3	14	pseudogene
	RBMY	0	0	pseudogene			PRAME	0	5	pseudogene
	TSPY1	14	52	pseudogene			RBMY	0	0	pseudogene
	TSPY3	0	19	pseudogene			TSPY1	14	52	pseudogene
	ZNF280B	18	15	pseudogene			TSPY3	0	19	pseudogene
	ZNF280A	15	22	pseudogene				14	71
		50	127				ZNF280B	18	15	pseudogene
							ZNF280A	15	22	pseudogene
								33	37

## Sheet: Table SS9
Table S9: Cattle Y-chromosome reads count table from RNA-Seq data indicating transcriptional activity
					PRJNA565682
	Wagyu_x_Charolais				Immature Testes			Mature Testes
	Lung	Muscle	Spleen	Liver	SRR10123379	SRR10123380	SRR10123381	SRR10123382	SRR10123383	SRR10123384
Gene
TSPY1	0	0	0	0	0	0	0	0	0	0			Samples
TUBA1C	2296	1934	2188	7616	323	291	396	158	222	142			Project	Accession	Samples
PRAME	0	0	0	0	0	1	0	0	1	4			PRJNA565682	SRR10123379	Immature Testis
PUDP	393	447	732	982	54	77	46	44	47	47				SRR10123380	Immature Testis
UBE2D3	29609	33880	59828	55756	3471	4225	4141	3949	3605	3549				SRR10123381	Immature Testis
ARSL-2	1303	20	556	24	113	287	33	6	3	3				SRR10123382	Mature Testis
ZNF280C	3464	2087	3941	2216	978	1237	1180	1716	1751	1737				SRR10123383	Mature Testis
ZNF280B	0	0	0	0	0	0	0	17	28	34				SRR10123384	Mature Testis
ZRSR2Y	4328	15	3530	3226	496	476	448	138	126	153
XG	133	424	725	91	106	51	444	185	172	139
ZFYVE27	10311	6258	11650	7621	545	650	654	395	324	358			Ampliconic gene family key
LOC132344373	16	8	8	13	36	33	34	1	0	0			TSPY
TSPY1	0	0	0	0	0	0	0	0	0	0			PRAME
TSPY1	0	0	0	0	0	0	0	0	0	0			ZNF280
PRAME	0	0	0	0	3	6	7	16	14	18			HSFY
MOBP	81	31	155	18	8	5	10	46	58	89			RBMY
ARSH	375	285	343	49	40	82	108	18	16	11
ZFY	12326	31	12457	7467	861	707	711	372	339	400
ARSL	518	521	152	5	391	704	404	14	6	13
TSPY1	0	0	0	0	0	0	0	0	0	0
ZFYVE9	10579	7896	9182	6344	894	1114	1187	1015	888	837
PRAME	0	0	0	0	0	0	0	1	0	0
TSPY3	0	0	0	0	0	0	0	0	0	0
PRAME	0	0	0	0	0	0	0	0	0	0
TBL1X	192	1607	654	351	164	170	143	55	40	49
PRKX-2	5716	734	5265	1591	405	390	421	288	406	229
TSPY3	0	0	0	0	0	0	0	0	0	0
TSPY1	0	0	0	0	0	0	0	0	0	0
TSPY1	0	0	0	0	0	0	0	0	0	0
ZNF280D	12242	8968	15021	8661	831	872	857	2224	2312	2281
PNPLA4	3	148	60	43	25	7	14	17	19	23
CSF2RA	2222	1410	1218	319	8	44	127	9	12	5
TSPY1	0	0	0	0	0	0	0	0	0	0
TSPY3	0	0	0	0	0	0	0	0	0	0
CD99	15866	8237	15674	10622	2808	2408	3950	517	616	361
SHROOM2	5281	1177	3195	7206	355	368	273	116	146	133
TSPY3	0	0	0	0	0	0	0	0	0	0
TSPY3	0	0	0	0	0	0	0	0	0	0
PRAME	0	0	0	0	0	0	0	5	5	4
UBE2D4	1188	3285	2275	2179	207	251	212	1225	941	1517
XG-2	76	544	424	72	70	33	45	21	23	22
TSPY1	0	0	0	0	0	0	0	0	0	0
SHOX	0	0	0	0	0	0	0	0	0	0
GYG2	352	6780	398	527	21	123	128	28	21	25
ARSD-2	921	130	437	12474	121	76	40	6	5	6
PNPLA4-2	854	598	1298	1298	55	56	21	22	14	20
HSFY	0	0	0	0	0	0	0	0	0	0
RBMY	0	0	0	0	0	0	0	0	0	0
ZFYVE21	5406	6084	4922	8325	753	528	798	2007	1902	1905
HSFY	0	0	0	0	0	0	0	0	0	0
HSFY	0	0	0	0	0	0	0	14	21	26
PRKX	2169	1858	3334	817	236	533	433	227	190	264
UBA1	56127	48455	84010	66176	4227	4421	4383	1873	1740	1581
NANOS1	825	735	1507	461	74	44	81	35	32	18
TRIOBP	14852	11941	25688	27094	1394	1442	1361	1184	1217	1094
DDX3Y	12242	18	11083	10879	803	924	1011	1622	1697	1761
ZFYVE16	17116	14901	18398	9606	1175	1257	860	1140	962	948
HSFY	0	0	0	0	0	0	0	0	2	1
TYROBP	265	620	6800	2477	107	110	67	43	39	24
MXRA5	1057	4413	390	42	391	622	311	8	5	8
STS	10	10	64	13	26	18	14	6	6	18
RBMY	0	0	0	0	0	0	0	0	0	0
LOC101902122	100	56	73	61	31	53	29	6	3	7
TSPY1	0	0	0	0	0	0	0	0	0	0
KDM6A	10263	11244	24993	15231	1124	1214	1265	419	442	438
TSPY1L2	10294	4437	9558	17566	1062	1119	1292	840	909	874
SHOX2	676	4339	25	202	465	724	616	82	68	76
ZNF280B	0	0	0	0	0	0	0	0	2	2
TBL1X-2	6070	3120	5864	6624	314	243	374	141	187	170
TSPY3	0	0	0	0	0	0	0	0	0	0
PRAME	0	0	0	0	0	0	0	0	0	0
HSFY	0	0	0	0	0	0	0	0	0	1
PRAME	0	0	0	0	0	1	0	10	11	3
TBL1XR1	25768	21158	38447	22771	2271	2202	2343	1189	1234	1024
RBMY	0	0	0	0	0	0	0	0	0	0
PRAME	0	0	0	0	0	2	1	0	1	2
TSPY1	0	0	0	0	0	0	0	0	0	0
GPM6B	8415	8878	1941	1528	2326	1927	2978	464	550	357
PRAME	0	0	0	0	0	2	1	2	2	1
ZNF280B	0	0	0	0	0	0	0	1	0	0
PRAME	0	0	0	0	0	1	1	0	1	1
EIF2S3	6411	16	6333	6758	432	418	483	219	185	242
PRAME	0	0	0	0	0	0	0	0	0	0
PRAME	0	0	0	0	0	0	0	0	0	0
HSFY	0	0	0	0	0	0	0	0	0	0
HSFY	0	0	0	0	0	0	0	0	1	1
BOS2D-2	0	1	0	0	0	0	0	0	0	0
TSPY1	0	0	0	0	0	0	0	0	0	0
TSPY1	0	0	0	0	0	0	0	0	0	0
PLCXD1	289	61	133	824	18	11	7	6	4	5
TSPY3	0	0	0	0	0	0	0	0	0	0
USP9Y	19995	69	23419	16153	2186	2330	2115	886	914	960
RUM1	173	436	485	300	33	10	21	36	10	8
TXLNG	5600	10	5587	7386	475	497	648	167	175	123
TSPY1L5	16913	13908	8542	2376	894	1083	1382	758	707	698
P2RY8	45	19	671	59	8	5	10	1	2	1
DHRSX-2	37	13	29	47	0	3	4	0	1	0
ZFYVE26	8295	10990	13741	14468	1170	1354	939	1073	1236	1099
GYG2-2	3366	5034	2236	3992	107	45	103	22	22	18
PPP2R3B	92	235	30	36	10	15	6	9	3	6
IL3RA	28	3	63	64	0	0	4	0	0	0
TSPY1	0	0	0	0	0	0	0	0	0	0
DHRSX	83	161	196	138	9	16	15	3	3	2
TSPY3	0	0	0	0	0	0	0	0	0	0
ZNF280B	0	0	0	0	0	0	0	0	0	0
SHOX	0	17	0	0	0	0	0	1	0	0
HSFY	0	0	0	0	0	0	0	0	1	1
TSPY1	0	0	0	0	0	0	0	0	0	0
PRAME	0	0	0	0	0	1	0	2	6	1
PRAME	0	0	0	0	0	2	4	0	5	1
HSFY	0	0	0	0	0	0	0	0	0	1
ZNF280B	0	0	0	0	0	0	0	0	0	0
LOC112445918	0	0	1	0	0	0	0	0	0	0
TSPY1	0	0	0	0	0	0	0	0	0	0
TSPY1	0	0	0	0	0	0	0	0	0	0
TSPY1	0	0	0	0	0	0	0	0	0	0
TSPY3	0	0	0	0	0	0	0	0	0	0
TSPY1L6	0	2	0	7	8	3	8	138	208	211
TSPY1	0	0	0	0	0	0	0	0	0	0
TSPY3	0	0	0	0	4	12	14	48	28	33
EI24	9384	9551	14777	29204	827	964	933	285	239	184
HSFY	0	0	0	0	0	0	0	0	0	0
HSFY	0	0	0	0	0	0	0	1	0	0
HSFY	0	0	0	0	0	0	0	14	10	6
TSPY1	0	0	0	0	0	0	0	0	0	0
TSPY1	0	0	0	0	0	0	0	0	0	0
ZNF280B	0	0	0	0	0	0	0	0	0	0
HOXA13	3	283	0	0	5	2	6	29	11	27
TSPY1	0	0	0	0	0	0	0	0	0	0
TSPY1	0	0	0	0	0	0	0	0	0	0
GPR143-2	84	13	34	47	0	9	0	1	8	1
MXRA5-2	1374	9195	779	101	221	218	481	6	0	6
TSPY1	0	0	0	0	0	0	0	2	3	0
OBP-2	0	0	0	0	0	1	0	0	0	1
OBP	0	0	0	0	0	0	0	0	0	0
SRY	14	1	1	0	4	0	1	0	0	0
RBMY	0	0	0	0	0	0	0	0	0	0
CD99L2	14729	24511	12136	8909	1206	1242	1113	161	126	98
ZNF280B	0	0	0	0	0	0	0	3	2	0
TSPY1	0	0	0	0	0	0	0	0	0	0
ZNF280A	0	0	1	0	0	1	0	0	0	0
ZNF280B	0	0	0	0	0	0	0	0	0	0
ARSH-2	1008	367	864	130	133	77	56	5	7	15
PRAME	0	0	0	0	50	109	86	159	138	162
TSPY3	0	0	0	0	0	0	0	0	0	0
PRAME	0	0	0	0	0	0	0	0	0	0
PRAME	0	0	0	0	0	0	0	0	0	0
BOS2D	0	0	0	0	0	0	0	0	1	0
PRAME	0	0	0	0	0	0	0	0	0	0
PRAME	0	0	0	0	0	0	0	0	0	0
HSFY	0	0	0	0	0	0	0	0	0	0
RBMY	0	0	0	0	1	2	2	1	1	3
ZNF280B	0	0	0	0	0	0	0	1	0	0
TUBA1B	135136	112534	432511	344433	9636	14054	15997	1408	1488	1210
SOBP	896	3823	396	194	1391	1729	1297	443	557	719
ZNF280B	0	0	0	0	0	0	0	1	1	4
UBE2E1	7459	11318	12517	6717	1298	1548	1651	1961	1847	1736
OXGR1	3	0	2	2138	174	356	297	7	108	75
HSFY	0	0	0	0	0	0	0	0	0	1
UBE2D2	16953	20498	27631	18740	1337	1540	1717	2578	2445	2534
TSPY1	0	0	0	0	0	0	0	0	1	0
HSFY	0	0	0	0	0	0	0	5	2	0
TSPY1	0	0	0	0	0	0	0	0	0	0
STS-2	85	36	157	38	2	3	10	2	3	0
TSPY1	0	0	0	0	0	0	0	0	0	0
TSPY1	0	0	0	0	0	0	0	0	0	0
TSPY1	0	0	0	0	0	0	0	0	0	0
TSPY1	0	0	0	0	0	0	0	0	0	0
KDM6A	8107	12	7985	7890	729	771	723	210	216	156
PRAME	0	0	0	0	0	0	0	0	0	0
TUBA1D	10194	178	680	867	162	22	21	35	28	39
PRAME	0	0	0	0	2	7	1	3	1	2
PRAME	0	0	0	0	0	0	0	1	5	7
TSPY3	0	0	0	0	0	0	0	0	0	0
PRAME	0	0	0	0	0	0	0	7	3	8
ZFYVE1	628	402	659	482	45	57	47	26	33	23
TSPY1	0	0	0	0	0	0	0	0	0	0
SHROOM2	4026	19	2141	4266	243	215	201	58	54	57
LOC101902122-2	11	9	16	3	0	0	0	1	0	0
PRAME	0	0	0	0	0	0	0	0	0	0
PRAME	0	0	0	0	1	4	0	1	4	2
TSPY1	0	0	0	0	0	0	0	0	0	0
TSPY1	0	0	0	0	0	0	0	0	0	0
ZNF280B	0	0	0	0	0	0	0	0	0	0
ZNF280B	0	0	0	0	0	0	0	1	0	0
HSFY	0	0	0	0	0	0	0	0	0	0
TSPY3	0	0	0	0	0	0	0	0	0	0
GPR143	20	38	2	9	23	5	9	1	3	1
LOC132344373-2	25	75	22	31	19	10	13	1	0	0
TSPY3	0	0	0	0	0	0	0	0	0	0
ZNF280B	0	0	0	0	0	0	0	1	0	0
HSFY	0	0	0	0	0	0	0	13	14	11
ARSD	535	287	273	8205	122	125	123	18	32	20
BOS2D	0	0	0	0	0	0	0	0	0	0
LOC112443502	23159	9668	42322	37143	2296	1821	2987	439	414	466
TSPY1	0	0	0	0	0	0	0	0	0	0
HSFY	0	0	0	0	0	0	0	42	57	6
TSPY1	0	0	0	0	0	0	0	0	0	0
EIF1AY	0	0	0	0	15	25	20	176	163	195
CD99-2	27872	27540	27232	16715	25	14	208	149	50	108
TSPY1	0	0	0	0	0	0	0	0	0	0
TSPY1	0	0	0	0	0	0	0	0	0	0
TSPY1	0	0	0	0	0	0	0	0	0	0
TXLNG	4377	5639	8805	14315	651	727	858	368	375	334
RBMY	0	0	0	0	0	0	0	0	0	0
HSFY	0	0	0	0	0	0	0	9	8	4
HSFY	0	0	0	0	0	0	0	0	0	0
TSPY1	0	0	0	0	0	0	0	0	0	0
TSPY1	0	0	0	0	0	0	0	0	1	0
TSPY1	0	0	0	0	0	0	0	0	0	0
TSPY1	0	0	0	0	0	0	0	0	0	0
PRAME	0	0	0	0	0	0	0	0	1	0
HSFY	0	0	0	0	0	0	0	0	0	0
HSFY	0	0	0	0	0	0	0	0	0	0
TSPY1	0	0	0	0	0	0	0	0	0	0
RPL23A	1260	823	1515	1171	60	58	66	44	42	40
TSPY1	0	0	0	0	0	0	0	0	0	0
UBE2D1	2063	2022	2719	1754	210	257	186	118	102	84
TSPY1	0	0	0	0	0	0	0	0	0	0
TSPY1	0	0	0	0	0	0	0	0	0	0
HSFY	0	0	0	0	0	0	0	0	1	2
PUDP-2	645	640	1091	1497	42	31	38	29	26	23
PRAME	0	0	0	0	2	11	3	10	18	18
ZNF280B	0	0	0	0	0	0	0	0	0	0
PSMB6	10628	10846	18785	20479	812	958	1038	911	761	836
LOC101902149	0	0	0	0	1	0	2	207	169	157
HSFY	0	0	0	0	0	0	0	0	0	0
TSPY1	0	0	0	0	0	0	0	0	0	0
ZNF280B	0	0	0	0	0	0	0	45	57	32
ZNF280B	0	0	0	0	0	0	0	0	0	0
TSPY1	0	0	0	0	0	0	0	0	0	0
RBMY	0	0	0	0	0	0	0	0	0	0
HSFY	0	0	0	0	0	0	0	0	2	0
ANOS1-2	5101	2365	388	811	26	8	23	0	6	8
CRLF2	4	0	374	189	0	0	0	2	0	0
PRAME	0	0	0	0	0	0	0	0	0	0
FOXG1	5	1	6	16	18	29	24	1448	1161	1538
HSFY	0	0	0	0	0	0	0	17	10	18
ZNF280B	0	0	0	0	0	0	0	0	0	0
TSPY1	0	0	0	0	0	0	0	0	0	0
HSFY	0	0	0	0	0	0	0	0	0	0
TSPY1	0	0	0	0	0	0	0	0	0	0
ZNF280B	0	0	0	0	0	0	1	0	0	0
EIF2S3	12290	19949	24057	16812	1107	1194	1240	160	129	103
PRAME	0	0	0	0	0	1	0	9	15	15
ZNF280B	0	0	0	0	0	0	0	1	0	0
OBP-2	0	0	0	0	1	0	0	0	0	0
TSPY3	0	0	0	0	0	0	0	0	0	1
TSPY1	0	0	0	0	0	0	0	0	0	0
BOS2D-2	0	0	3	0	0	1	0	0	0	1
TSPY1	0	0	0	0	0	0	0	0	0	0
ASMTL	12	753	255	186	41	318	36	10	44	82
SLC25A6	20291	12745	22535	12245	2275	2431	2109	255	315	184
PRAME	0	0	0	0	0	0	0	0	0	0
ASMTL	3768	3440	4560	10325	311	100	292	186	147	128
HSFY2	0	0	0	0	0	0	0	0	0	0
HSFY	0	0	0	0	0	0	0	0	0	0
ZNF280B	0	0	0	0	0	0	0	1	0	0
TSPY1	0	0	0	0	0	0	0	0	0	0
HSFY2	0	0	0	0	0	0	0	32	29	22
TSPY1	0	0	0	0	0	0	0	0	0	0
TSPY3	0	0	0	0	0	0	0	0	0	0
HSFY	0	0	0	0	0	0	0	29	22	22
TSPY1	0	0	0	0	0	0	0	0	0	0
TSPY1	0	0	0	0	0	0	0	0	0	0
OBP	0	0	0	0	0	0	0	0	0	0
OFD1Y	8050	9	6588	4729	899	655	658	170	141	150
TSPY1	0	0	0	0	0	0	0	0	0	0
AKAP17A	243	20	342	464	5	5	7	8	8	2
HSFY	0	0	0	0	0	0	0	0	1	1
ZFYVE19	2171	1214	2383	2987	132	123	64	71	53	62
TSPY1	0	0	0	0	0	0	0	0	0	0
GTPBP6	659	653	649	1300	30	24	43	20	12	9
TSPY1	0	0	0	0	0	0	0	0	1	0
ANOS1	2099	893	249	312	61	44	16	19	7	9
ZNF280B	0	0	0	0	0	0	0	0	2	0
LOC104969408	73	587	106	88	6	108	10	48	59	64
TUBA1A	58401	129612	48943	16037	4459	6826	8299	1753	2227	1608
SLC25A6	2068	2415	2459	1377	1457	1358	1220	112	99	98
HSFY	0	0	0	0	0	0	0	0	0	0
HSFY	0	0	0	0	0	0	0	0	0	0
RBMY	0	0	0	0	0	0	0	0	0	0
TSPY1	0	0	0	0	0	0	0	0	0	0
RBMY	0	0	0	0	0	0	0	0	0	0
TSPY1	0	0	0	0	0	0	0	0	0	0
HSFY	0	0	0	0	0	0	0	1	0	0
TSPY1	0	0	0	0	0	0	0	3	3	0
HSFY	0	0	0	0	0	0	0	9	6	8
ZFYVE28	263	164	44	794	5	9	17	30	23	21
HSFY	0	0	0	0	0	0	0	2	2	0
TSPY1	0	0	0	0	0	0	0	0	0	0
TSPY1L1	15896	11179	23503	15542	1468	2082	2396	1762	1625	1752
OBP	0	0	0	0	0	0	0	0	0	0
TSPY1	0	0	0	0	0	0	0	0	0	0
TSPY1	0	0	0	0	0	0	0	0	0	0
EIF1AX	11116	11788	27995	27750	1367	1668	1867	2158	2004	2007
ZNF280B	2909	2536	11401	9639	234	350	366	972	850	928
TSPY1	0	0	0	0	0	0	0	0	0	0
OR4C6	0	0	0	0	0	0	0	3	0	0
RPL23A	39	31	66	35	4	3	2	0	0	0
TSPY1	0	0	0	0	0	0	0	0	0	0
HSFY	0	0	0	0	0	0	0	2	3	0
TSPY1L4	15529	10139	12538	12070	1759	1623	1075	1273	1288	1183
TSPY1	0	0	0	0	0	0	0	0	0	0
AMELY	20	0	15	6	0	0	2	2	0	0
HSFY	0	0	0	0	0	0	0	123	130	92
RBMY	0	0	0	0	0	0	0	0	0	0
RBMY	0	0	0	0	0	0	0	0	0	0
ZNF280B	0	0	0	0	0	0	0	0	2	0
PRAME	0	0	0	0	0	0	0	0	0	0
OBP-2	0	0	0	0	0	0	0	0	0	0

## Sheet: Table SS10
Table S10: Sheep Y-chromosome reads count table from RNA-Seq data indicating transcripts activity
NCBI project accession	PRJNA552574																		PRJNA437085
	Treatment									Control									A			D
NCBI sample accession	SRR9641578	SRR9641580	SRR9641581	SRR9641582	SRR9641585	SRR9641589	SRR9641592	SRR9641594	SRR9641595	SRR9641579	SRR9641583	SRR9641584	SRR9641586	SRR9641587	SRR9641588	SRR9641590	SRR9641591	SRR9641593	SRR6809231	SRR6809232	SRR6809233	SRR6809234	SRR6809235	SRR6809236
Gene
PRB3	24	5	6	6	20	31	5	30	2	14	24	16	7	3	9	4	17	11	12	9	18	13	54	15
TBL1X-2	395	185	481	439	407	461	359	257	259	316	369	493	403	386	304	297	354	434	375	136	177	134	483	268
PNPLA4	24	54	41	50	24	34	12	46	53	34	34	31	42	49	27	44	17	46	52	10	34	16	46	30
KDM6A	133	102	127	76	87	108	209	139	88	100	93	117	43	94	96	78	77	122	111	43	59	48	107	77
AARSD1	972	791	894	842	1066	716	979	1218	1108	995	750	1113	885	1015	934	1065	625	973	664	872	920	1121	563	936
HSFY	0	0	0	0	0	0	0	0	0	0	0	0	0	0	0	0	0	0	27	31	41	44	16	21
CSF2RA-2	153	173	231	77	138	140	122	115	153	205	122	67	54	167	295	156	84	324	41	15	9	17	29	18
TRIOBP	1535	1620	1567	1311	1527	1353	1324	1561	1117	1983	1736	3340	2442	1462	1296	1623	1339	1395	2151	1239	1335	943	1160	1037
CSF2RA	46	54	39	40	52	46	107	47	43	27	16	43	22	27	19	51	44	33	51	5	36	37	68	58			Ampliconic gene family key
OFD1	370	318	314	372	379	289	445	439	371	263	200	366	191	250	242	329	275	588	840	1437	1429	1032	897	561			TSPY
BOS2D	0	0	0	0	0	0	0	0	0	0	0	0	0	0	0	0	0	0	0	0	0	0	0	0			PRAME
BOS2D-2	0	0	0	0	0	0	0	0	0	0	0	0	0	0	0	0	0	0	0	0	0	0	0	0			ZNF280
PNPLA4-2	20	0	14	14	25	44	22	20	11	22	29	50	41	3	2	20	9	4	41	34	3	28	34	41			HSFY
OBP-2	0	0	0	0	0	0	0	0	0	0	0	0	0	0	0	0	0	0	0	0	0	0	0	0			RBMY
ZFYVE16	284	551	418	600	366	298	534	494	532	497	524	761	419	261	309	564	275	693	1296	986	1016	916	1215	1359
HSFY	0	0	0	0	0	0	0	0	0	0	0	0	0	0	0	0	0	0	1	0	0	0	0	0
ZFYVE21	1102	1682	1143	989	1032	1169	1084	1229	875	953	514	946	589	904	842	677	1107	1332	1129	1378	1163	891	843	1024
ZFYVE27	856	846	857	808	1053	803	611	1057	704	677	560	815	693	838	603	853	667	844	550	454	415	395	578	551
ZMYND8	632	355	507	549	543	335	570	390	578	533	609	722	724	600	505	586	435	510	631	768	856	591	988	586
TBL1X	362	511	358	355	389	347	375	556	458	281	311	370	340	302	330	525	351	415	376	80	160	93	146	212
PUDP	0	2	2	6	0	0	0	3	0	3	2	2	1	8	3	5	1	4	6	11	14	5	19	13
ZNF280B	0	0	1	0	1	1	1	0	0	0	1	1	0	0	0	0	0	0	7	7	13	8	6	11
TSPY3	18	16	12	18	17	26	8	18	10	7	4	10	9	12	11	3	10	27	48	57	54	46	52	60
ZFY	293	327	277	346	188	205	466	405	366	301	253	545	235	169	168	284	200	441	967	486	658	534	1194	936
SLC25A6-2	13	1	15	7	10	4	3	7	8	3	1	2	0	8	3	7	3	15	27	5	4	8	8	15
IL3RA	14	10	14	27	30	30	22	36	15	9	13	39	28	9	12	25	16	24	31	13	24	23	21	13
STS	26	27	17	48	19	13	21	42	37	18	20	28	24	31	29	29	18	43	28	7	21	9	20	10
ASMTL-2	1094	430	394	511	1105	928	893	818	434	76	249	832	801	441	67	73	739	108	46	11	47	11	95	25
ZNF280B	0	0	0	0	0	0	0	0	0	0	0	0	0	0	0	0	0	0	0	1	4	1	1	2
EIF1AY	0	0	0	0	0	0	0	0	0	0	0	0	0	0	0	0	0	0	0	0	0	0	0	0
BCORL1	272	206	297	246	289	192	288	303	113	130	167	154	133	221	178	153	186	350	107	56	81	53	143	119
TBL1XR1	757	1742	1343	1818	1192	1116	1608	1684	1952	1051	1155	1656	1081	1016	994	1576	1021	2393	1407	1102	1285	1212	1657	1446
ARSD	0	0	0	0	0	0	2	0	0	0	0	0	0	0	0	0	1	0	0	1	1	0	1	0
ZNF280B	0	0	0	1	0	0	0	0	1	0	0	0	0	0	0	0	0	0	33	49	65	28	34	29
AKAP17A	610	746	364	610	328	334	703	400	272	319	199	584	536	372	292	474	262	297	283	280	640	403	514	486
NLGN4X	58	86	189	96	30	9	59	53	67	14	3	10	33	245	177	41	44	73	15	15	6	3	5	4
HINT1	76	61	61	126	116	100	107	149	192	99	153	143	69	129	133	104	88	146	130	372	483	194	120	380
GPR143	31	11	14	22	17	19	22	33	32	24	16	20	18	24	19	24	19	18	1	0	0	0	7	0
SHROOM2	284	673	425	620	739	585	346	493	486	323	280	305	312	442	338	366	386	572	122	34	84	73	190	103
DDX3X	3013	4376	3491	6219	3659	3277	4165	4921	7019	5013	4940	8607	5287	2905	2870	5777	3100	5984	5000	1499	2341	1893	4793	3214
OFD1	26	14	10	20	12	15	16	12	16	22	10	24	5	18	5	14	17	21	42	71	51	48	35	32
TSPY3	2	3	2	1	7	3	3	3	1	2	1	4	1	6	1	4	2	11	30	36	32	30	35	50
KDM6A	412	533	468	895	589	441	441	649	752	705	661	1030	732	435	439	923	372	747	995	576	682	577	1284	968
P2RY8-2	0	6	3	3	3	1	0	1	2	6	1	0	2	0	2	1	0	4	1	0	0	1	1	2
ZNF280B	0	0	0	0	0	0	0	0	0	0	0	0	0	0	0	0	0	0	0	0	0	0	0	0
XG	147	229	152	29	26	13	193	20	100	224	112	5	44	108	201	145	19	463	309	8	78	44	165	169
PLCXD1-2	15	38	27	9	19	15	33	10	13	30	6	11	7	21	26	12	25	34	11	12	5	7	27	23
PLCXD1	1	2	0	2	9	5	2	0	4	1	2	4	1	3	3	0	2	3	21	1	4	3	16	5
ZFYVE1	939	754	864	927	960	745	677	938	720	837	899	788	964	932	733	1085	677	940	1018	1365	861	934	1027	1166
OBP	0	0	0	0	0	0	0	0	0	0	0	0	0	0	0	0	0	0	0	0	0	0	0	0
RPF2	254	220	212	193	179	160	417	279	186	172	125	239	120	123	187	135	132	250	350	234	341	250	326	307
ZNF280B	0	0	0	0	0	0	0	0	0	0	0	0	0	0	0	0	0	0	1	7	4	6	3	2
ARSL-2	2	0	2	0	0	1	2	2	0	0	0	2	0	0	0	0	1	2	1	1	2	1	4	0
MOBP	2	3	4	5	6	4	1	8	3	1	1	1	1	4	4	1	1	6	0	4	0	4	0	1
EIF2S3	0	0	0	0	0	0	0	0	0	0	0	0	0	0	0	0	0	0	0	0	0	0	0	0
PPP2R3B-2	34	89	95	81	83	82	198	93	63	52	63	15	15	83	90	32	102	75	3	2	31	47	31	72
CD99L2	321	446	394	741	590	483	172	669	832	558	687	838	680	534	352	704	399	647	274	65	106	90	240	192
USP9X	0	0	0	0	0	0	0	0	0	2	0	0	0	0	0	0	0	0	0	0	0	0	0	0
ASMTL	15	2	37	26	68	64	39	45	66	1	41	14	34	40	6	4	85	3	1	3	7	5	11	7
ZNF280B	0	0	0	0	0	0	0	0	0	0	0	0	0	0	0	0	0	0	12	18	18	13	8	4
ZNF160-2	30	64	63	16	13	7	142	67	72	103	39	31	85	55	41	130	40	137	126	46	65	23	39	34
ARSH-2	0	0	0	0	0	0	0	0	0	0	0	0	0	0	0	0	0	0	0	0	0	0	0	0
ARSD-2	0	0	0	0	0	0	0	0	0	0	0	0	0	0	0	0	0	0	0	0	1	0	0	1
CHP2	21	13	15	18	19	28	19	18	19	20	8	17	16	13	13	14	20	21	17	3	5	11	13	11
USP9X	2461	2902	2724	5107	2710	1891	2890	3342	4742	3934	4952	7715	6233	2446	2185	5879	1806	3949	5187	2364	3171	2833	6016	4220
GPM6B	271	845	629	650	502	543	892	744	707	495	548	658	447	411	410	582	583	991	379	19	155	215	394	300
GYG2	118	60	168	86	117	86	183	114	47	46	24	118	33	76	57	42	38	74	43	51	116	45	32	29
ZNF160	151	81	77	115	109	79	208	118	116	61	77	212	83	83	93	77	43	63	136	36	96	79	186	198
OBP	0	0	0	0	0	0	0	0	0	0	0	0	0	0	0	0	0	0	0	0	0	0	0	0
NLGN4X-2	296	75	164	272	74	51	128	146	203	27	19	19	4	176	138	68	132	208	16	6	6	9	10	11
IL3RA-2	10	16	8	7	8	5	1	0	16	23	10	9	5	15	17	20	5	20	10	6	6	6	4	4
PRAME	27	16	18	41	41	24	39	23	10	20	5	19	12	20	30	8	14	33	120	205	203	158	97	121
ARSL	0	2	3	0	0	0	1	0	0	0	0	0	0	0	0	0	0	1	3	0	0	2	5	2
PRKX	147	171	196	193	106	82	106	131	116	167	225	545	327	106	67	195	77	88	497	125	418	255	278	247
ZNF280B	0	0	0	0	0	0	0	0	0	0	0	0	0	0	0	0	0	0	14	22	34	21	18	9
ANOS1-2	2	11	0	6	5	4	1	0	4	2	3	1	3	0	0	1	5	10	0	0	0	2	5	4
HSFY	0	0	0	0	0	0	0	0	0	0	0	0	0	0	0	0	0	0	0	1	1	1	2	1
ZNF280B	0	0	0	0	0	0	2	0	0	0	0	0	0	0	0	0	0	0	7	17	23	12	14	4
P2RY8	7	5	7	3	3	4	2	4	5	5	3	14	3	2	7	10	2	8	7	0	1	4	1	7
GPR143-2	23	12	19	25	24	17	14	18	23	16	15	34	12	28	22	19	13	32	63	8	16	14	37	30
UBA1	5248	4003	4265	4928	6374	3775	3903	5433	4263	5487	4653	6271	7005	4832	4056	5451	3142	4279	2821	1828	2075	1523	2465	2009
ASMT	6	8	4	11	6	9	0	6	2	0	0	3	4	4	2	0	2	3	4	0	7	5	11	4
ZFYVE28	114	422	164	277	217	288	74	166	87	90	46	130	72	113	117	46	187	200	25	19	22	13	35	34
XG-2	101	116	146	271	202	181	78	251	50	15	70	283	111	75	11	113	121	24	25	5	23	18	8	12
SOBP	1891	3430	4029	2806	3133	2069	3160	2734	2817	1303	1133	1248	1151	3769	2384	1618	2277	2524	1338	2544	2048	1022	1020	483
OBP-2	0	0	0	0	0	0	0	0	0	0	0	0	0	0	0	0	0	0	0	0	0	0	0	0
ZNF280B	3	2	1	1	2	0	4	4	3	2	0	1	1	1	3	0	0	4	16	31	25	28	18	19
CD99-2	5	6	6	10	11	8	0	10	10	0	5	14	6	13	7	5	2	3	39	3	10	6	12	9
ZFYVE9	449	569	582	734	606	440	527	681	713	480	402	485	354	474	456	527	415	707	479	309	429	443	564	562
ZFYVE26	610	926	755	1250	1165	811	610	856	893	1131	1291	1458	1723	880	646	1644	627	1062	1175	624	631	510	930	857
HSFY	0	0	0	0	0	0	0	0	0	0	0	0	0	0	0	0	0	0	33	78	88	75	51	45
ZNF280B	0	1	0	2	2	0	0	0	0	0	0	0	0	0	0	0	0	0	28	29	40	34	15	8
SF3A2	3914	3141	3676	2649	4040	2501	3759	3270	2236	2311	1447	2276	2461	3684	3009	2004	3356	2793	1230	1857	1574	1590	1274	1402
TSPY3	6	19	11	29	13	12	11	17	11	6	5	10	3	7	8	9	9	21	20	14	20	13	11	24
ZNF280B	0	0	0	0	1	0	0	0	0	0	0	0	0	0	1	3	0	1	9	38	24	16	11	13
SF3A2	5	4	3	7	3	2	3	3	2	6	5	6	2	4	6	3	4	14	29	11	18	11	34	21
ZNF280B	2	0	0	0	0	0	0	0	0	0	0	0	0	0	0	0	0	4	3	14	16	7	17	11
PRELID1-2	0	0	0	0	0	0	1	0	0	0	0	0	0	0	0	0	0	0	0	0	1	1	0	0
CRLF2	4	8	3	7	8	5	8	16	1	5	2	7	2	5	4	0	2	4	5	5	2	8	8	8
USP9X	396	749	554	965	508	468	746	736	638	681	751	1124	635	434	412	801	354	922	1834	1081	1362	1114	2248	2003
CD99	0	0	1	0	1	0	0	0	0	1	0	1	0	0	0	0	0	0	8	1	9	0	7	10
MXRA5	44	165	45	44	74	92	40	44	28	26	25	60	77	46	40	45	69	28	54	10	23	6	17	23
OBP	0	0	0	0	0	0	0	0	0	0	0	0	0	0	0	0	0	0	0	0	0	0	0	0
ZBED1	0	0	0	0	0	0	0	2	1	4	2	0	0	2	0	1	0	0	0	1	4	1	4	4
PPP2R3B	362	303	188	275	350	347	26	228	109	132	58	328	199	179	172	173	187	172	221	146	108	86	180	146
BOS2D	0	0	0	0	0	0	0	0	0	0	0	0	0	0	0	0	0	0	0	0	0	0	0	0
STS-2	21	36	25	38	23	23	12	27	34	13	16	20	17	29	12	27	14	30	23	15	16	13	17	22
PUDP-2	36	2	11	14	0	2	14	13	1	0	0	9	10	20	13	52	9	12	24	27	2	3	0	1
ZNF280B	0	0	0	0	0	0	0	0	0	0	0	0	0	0	0	0	0	0	5	3	6	4	5	6
COMMD2	263	248	275	283	199	237	451	413	351	237	200	364	225	186	178	222	195	416	216	113	127	140	208	194
RBMY	1	7	2	12	5	0	6	10	7	7	6	8	13	0	3	12	8	17	98	56	103	61	121	165
SHOX	1	13	1	2	5	8	6	10	1	0	1	1	0	2	2	2	5	1	2	1	0	1	2	1
ZNF280B	0	0	0	0	0	0	0	0	0	0	0	0	0	0	0	0	0	0	0	0	0	0	0	0
RIC1-RGP1	0	0	0	0	0	0	0	0	0	0	0	0	0	2	0	1	0	0	1	0	1	0	1	0
ZRSR2Y	190	145	87	194	154	180	286	197	210	133	95	180	105	110	96	125	114	284	310	160	227	202	311	226
SRY	5	15	10	18	8	13	22	17	15	13	6	2	2	5	5	3	15	21	0	1	2	2	7	2
ARSH	0	0	0	0	0	0	0	0	0	0	0	0	0	0	0	1	0	0	0	0	0	0	0	0
ANOS1	0	2	3	1	7	2	0	0	5	0	2	0	2	1	5	0	1	1	4	0	0	2	0	0
AKAP17A-2	302	447	550	319	554	627	251	500	470	553	281	389	286	628	437	210	539	388	327	364	14	136	69	116
BOS2D	0	0	0	0	0	0	0	0	0	0	0	0	0	0	0	0	0	0	0	0	0	0	0	0
DHRSX	72	19	86	41	66	46	29	49	74	87	54	35	41	70	53	44	42	50	4	2	5	2	11	1
ZNF280B	0	0	0	0	0	0	0	0	1	0	0	0	0	1	0	0	0	1	18	36	61	41	25	29
OXGR1	622	173	466	340	147	141	262	313	547	413	524	401	297	491	493	453	285	398	48	21	27	33	200	94
HINT1-2	105	85	173	103	106	84	213	112	217	123	171	199	32	70	25	110	128	190	444	174	295	393	212	135
ZNF280B	0	2	3	1	0	0	0	0	0	0	1	1	0	2	0	0	0	2	11	40	34	14	28	20
PRB1	0	0	1	0	0	0	0	1	0	0	0	1	0	0	0	0	0	0	0	0	0	0	0	1
DDX3X	337	434	323	607	310	303	414	413	589	528	600	878	511	259	250	626	229	636	2072	2512	2672	2082	2649	2243
ARPC1A	1489	1063	1353	1013	1119	938	1840	1244	1129	1126	1115	1482	927	1207	1177	961	792	1509	1037	989	922	740	995	905
LOC132658999	0	1	0	0	0	0	0	0	0	0	0	0	0	0	1	0	0	0	152	431	357	351	195	159
SHOX-2	3	0	0	3	1	0	0	0	0	0	0	0	0	0	0	3	0	0	0	0	0	0	0	0
GYG2-2	9	41	35	21	37	33	11	25	15	13	10	18	14	13	10	3	19	18	281	40	65	40	109	226
ZNF280B	0	0	0	0	0	0	0	0	0	0	0	0	0	0	0	0	0	0	6	6	3	11	1	1
BOS2D	0	0	0	0	0	0	0	0	0	0	0	0	0	0	0	0	0	0	0	0	0	0	0	0
PRKX-2	208	74	75	67	125	110	208	209	167	257	229	294	222	134	136	231	93	197	147	38	79	59	181	127
LOC132658880	40	30	17	36	40	33	26	38	72	33	41	42	42	26	25	55	26	41	42	21	32	20	60	28
EIF1AX	2139	1841	1725	2353	1611	1513	1570	2515	3600	3060	2754	4066	2548	1963	1885	2457	1232	2451	2308	2024	2322	2009	2413	2316
HSFY	0	0	0	0	0	0	0	0	0	0	0	0	0	0	0	0	0	0	59	137	113	144	93	60
GTPBP6	345	15	48	35	297	280	103	294	61	15	51	221	266	58	20	10	92	22	190	58	70	53	74	110
ZNF280B	0	1	1	1	3	1	1	1	0	1	1	0	0	1	0	0	0	0	5	5	7	3	8	8
PRELID1	1	1	0	0	0	0	1	0	0	0	0	0	0	0	0	1	0	0	11	7	5	5	8	13
ZNF280B	1	1	1	2	3	1	0	0	0	0	0	1	1	0	1	0	0	1	5	11	10	8	3	16
HSFY	0	0	0	0	0	0	0	0	0	0	0	0	0	0	0	0	0	0	96	181	210	142	96	69
ZBED1-2	1	0	0	1	0	2	0	1	0	0	0	2	0	2	0	2	0	1	3	0	1	0	6	0
BOS2D-2	0	0	0	0	0	0	0	0	0	0	0	0	0	0	0	0	0	0	0	0	0	0	0	0
PRELID1	795	478	593	569	685	493	504	780	724	693	731	914	662	636	590	822	396	592	510	223	267	222	349	354
OBP	0	0	0	0	0	0	0	0	0	0	0	0	0	0	0	0	0	0	0	0	0	0	0	0
SHOX2	198	855	322	274	395	354	876	453	286	189	118	152	106	286	218	152	247	469	99	27	79	52	92	105
TSPY3	5	14	5	3	2	9	3	12	4	1	1	2	2	5	5	1	0	14	46	25	36	33	41	42
SLC25A6	6516	3505	4199	2929	4234	3652	7346	4454	3558	3087	2297	2259	3324	4484	4092	3076	4573	4021	1163	158	399	252	726	598
BOS2D-2	0	0	0	0	0	0	0	0	0	0	0	0	0	0	0	0	0	0	0	0	0	0	0	0
ZNF280B	0	0	2	3	3	2	2	3	0	0	1	1	0	2	0	0	2	1	8	8	10	13	14	13
OBP-2	0	0	0	0	0	0	0	0	0	0	0	0	0	0	0	0	0	0	0	0	0	0	0	0
TYROBP	175	239	144	151	336	301	129	211	194	181	103	113	112	131	87	210	148	397	84	19	45	31	67	33
HINT1	0	0	0	1	3	0	0	0	0	0	2	0	0	2	6	1	2	0	7	30	35	7	3	21
HSFY	0	0	0	0	0	0	0	0	0	0	0	0	0	0	0	0	0	0	86	187	180	173	119	85
EI24	241	211	226	232	223	172	267	285	295	249	239	275	310	200	195	292	160	291	160	66	73	47	125	118
MXRA5-2	59	110	70	55	94	118	28	88	34	51	36	107	126	53	49	35	59	67	48	11	28	13	10	13
ASMT-2	0	2	5	0	1	2	0	2	3	1	1	0	0	1	5	1	3	12	5	2	1	8	2	6
ZNF280B	0	0	0	1	0	0	0	1	0	0	0	0	0	0	0	0	1	2	7	15	12	4	19	15
GTPBP6-2	547	655	757	560	564	506	884	513	785	819	666	324	406	739	700	528	657	614	120	17	76	65	170	115
COMMD2	56	73	85	97	68	72	105	106	58	77	61	106	65	35	44	52	47	60	61	54	79	39	44	57
CHP2	22	36	43	47	92	44	65	43	28	23	2	19	5	24	16	17	28	78	47	13	18	8	33	30
CRLF2-2	3	4	1	8	10	4	4	12	1	0	2	5	1	3	4	1	1	0	1	5	8	3	3	7
ZFYVE19	366	203	233	216	278	223	357	315	239	248	265	202	238	271	255	266	178	274	112	102	113	124	101	162
HSFY	1	0	0	0	0	0	1	0	0	0	0	0	0	0	0	0	0	0	53	117	126	119	63	63
ZNF280B	0	0	0	0	0	0	0	0	0	0	0	0	0	0	0	0	0	0	8	9	11	5	6	5
BOS2D-2	0	0	0	0	0	0	0	0	0	0	0	0	0	0	0	0	0	0	0	0	0	0	0	0
ZNF280B	0	0	0	0	0	0	0	0	0	0	1	0	0	1	0	0	0	0	51	85	51	38	27	35
ZNF280B	0	0	2	0	0	1	0	0	1	0	0	1	0	0	0	1	1	0	17	17	37	17	13	13
ZNF280B	0	1	0	0	0	0	0	1	0	0	0	0	0	0	0	0	0	0	12	37	52	28	19	26
NANOS1	49	70	54	46	36	49	41	44	48	107	31	116	62	40	26	58	70	44	52	10	31	24	24	38
TSPY3	5	6	5	12	0	0	8	2	1	0	0	0	0	7	5	1	5	7	25	18	16	22	11	23
FOXG1	30	46	36	36	37	34	62	60	18	10	8	25	6	29	25	15	36	41	493	1211	1069	819	666	725
HSFY	0	0	0	0	0	0	0	0	0	0	0	0	0	0	0	0	0	0	51	105	88	67	52	37
RPF2	16	39	28	40	21	15	16	33	39	23	31	31	29	30	30	45	29	64	95	77	78	60	80	67
AMELY	11	5	6	9	6	5	14	16	11	8	9	6	6	6	5	15	2	8	7	2	3	1	4	3
EIF2S3	697	636	639	768	526	458	1429	760	1166	928	789	1406	608	488	552	798	473	892	1089	753	859	750	1345	1164
OBP-2	0	0	0	0	0	0	0	0	0	0	0	0	0	0	0	0	0	0	0	0	0	0	0	0
ZNF280B	0	0	0	0	0	0	1	3	0	0	1	2	0	1	1	2	0	0	1	1	0	4	2	3
HSFY	0	0	0	0	0	0	0	0	0	0	0	0	0	0	0	0	0	0	86	179	185	168	102	65
ZNF280B	0	0	0	0	0	0	0	0	0	0	0	0	0	0	0	0	0	0	1	0	3	0	2	1
GTBP1	83	197	157	154	130	130	82	145	161	147	121	122	74	137	133	129	58	195	270	302	391	330	353	507
HSFY	0	0	0	0	0	0	0	0	0	0	0	0	0	0	0	0	0	0	42	96	76	82	58	38
HSFY	0	0	0	0	0	0	0	0	0	0	0	0	0	0	0	0	0	0	15	24	36	28	13	10
DHRSX-2	225	222	345	326	504	397	327	400	404	304	196	397	295	551	332	285	337	269	51	12	27	20	48	33

[truncated: 7 more sheets: Table SS11, Table SS12, Table SS13, Table SS14, Table SS15, Table SS16, Table SS17]
